# Supplementary material for: Bioactive Phenylalanine Derivatives and Cytochalasins from the Soft Coral-Derived Fungus, Aspergillus elegans
Source: PubMed Central journal article supplement (PMC3721221; doi:10.3390/md11062054), 2013-06-10
Supplement: marinedrugs-11-02054-s001.pdf [file marinedrugs-11-02054-s001.pdf]

## Supporting Information

- Figure S1.**  $^1\text{H}$  NMR (600 MHz,  $\text{DMSO-}d_6$ ) spectrum of compound **1**
- Figure S2.**  $^{13}\text{C}$  NMR (150 MHz,  $\text{DMSO-}d_6$ ) spectrum of compound **1**
- Figure S3.** HMQC ( $\text{DMSO-}d_6$ ) spectrum of compound **1**
- Figure S4.**  $^1\text{H-}^1\text{H}$  COSY ( $\text{DMSO-}d_6$ ) spectrum of compound **1**
- Figure S5.** HMBC spectrum ( $\text{DMSO-}d_6$ ) of compound **1**
- Figure S6.** HRESIMS spectrum of compound **1**
- Figure S7.**  $^1\text{H}$  NMR (600 MHz,  $\text{CDCl}_3$ ) spectrum of compound **3**
- Figure S8.**  $^{13}\text{C}$  NMR (150 MHz,  $\text{CDCl}_3$ ) spectrum of compound **3**
- Figure S9.** HMQC ( $\text{CDCl}_3$ ) spectrum of compound **3**
- Figure S10.**  $^1\text{H-}^1\text{H}$  COSY ( $\text{CDCl}_3$ ) spectrum of compound **3**
- Figure S11.** HMBC ( $\text{CDCl}_3$ ) spectrum of compound **3**
- Figure S12.** NOESY ( $\text{CDCl}_3$ ) spectrum of compound **3**
- Figure S13.** HRESIMS spectrum of compound **3**
- Figure S14.**  $^1\text{H}$  NMR (600 MHz,  $\text{CDCl}_3$ ) spectrum of compound **4**
- Figure S15.**  $^{13}\text{C}$  NMR (150 MHz,  $\text{CDCl}_3$ ) spectrum of compound **4**
- Figure S16.** HMQC ( $\text{CDCl}_3$ ) spectrum of compound **4**
- Figure S17.**  $^1\text{H-}^1\text{H}$  COSY ( $\text{CDCl}_3$ ) spectrum of compound **4**
- Figure S18.** HMBC ( $\text{CDCl}_3$ ) spectrum of compound **4**
- Figure S19.** HRESIMS spectrum of compound **4**
- Figure S20.**  $^1\text{H}$  NMR (400 MHz,  $\text{Acetone-}d_6$ ) spectrum of compounds **13a-1/13b-1**
- Figure S21.**  $^{13}\text{C}$  NMR (100 MHz,  $\text{Acetone-}d_6$ ) spectrum of compounds **13a-1/13b-1**
- Figure S22.** ESIMS spectrum of compounds **13a-1/13b-1**
- Figure S23.**  $^1\text{H}$  NMR (400 MHz,  $\text{Acetone-}d_6$ ) spectrum of compounds **13a-2/13b-2**
- Figure S24.**  $^{13}\text{C}$  NMR (100 MHz,  $\text{Acetone-}d_6$ ) spectrum of compounds **13a-2/13b-2**
- Figure S25.** ESIMS spectrum of compounds **13a-2/13b-2**
- Figure S26.**  $^1\text{H}$  NMR (400 MHz,  $\text{Acetone-}d_6$ ) spectrum of compounds **13a-3/13b-3**
- Figure S27.**  $^{13}\text{C}$  NMR (100 MHz,  $\text{Acetone-}d_6$ ) spectrum of compounds **13a-3/13b-3**
- Figure S28.** ESIMS spectrum of compounds **13a-3/13b-3**
- Figure S29.**  $^1\text{H}$  NMR (400 MHz,  $\text{Acetone-}d_6$ ) spectrum of compounds **14a/14b**
- Figure S30.**  $^{13}\text{C}$  NMR (100 MHz,  $\text{Acetone-}d_6$ ) spectrum of compounds **14a/14b**
- Figure S31.** ESIMS spectrum of compounds **14a/14b**
- Figure S32.** The determination of the absolute configuration of **1** by Marfey's Method
- S1.** The spectroscopic data of **13a-1/13b-1**, **13a-2/13b-2**, **13a-3/13b-3**, **14a/14b**

**Figure S1.**  $^1\text{H}$  NMR (600 MHz,  $\text{DMSO-}d_6$ ) spectrum of compound 1.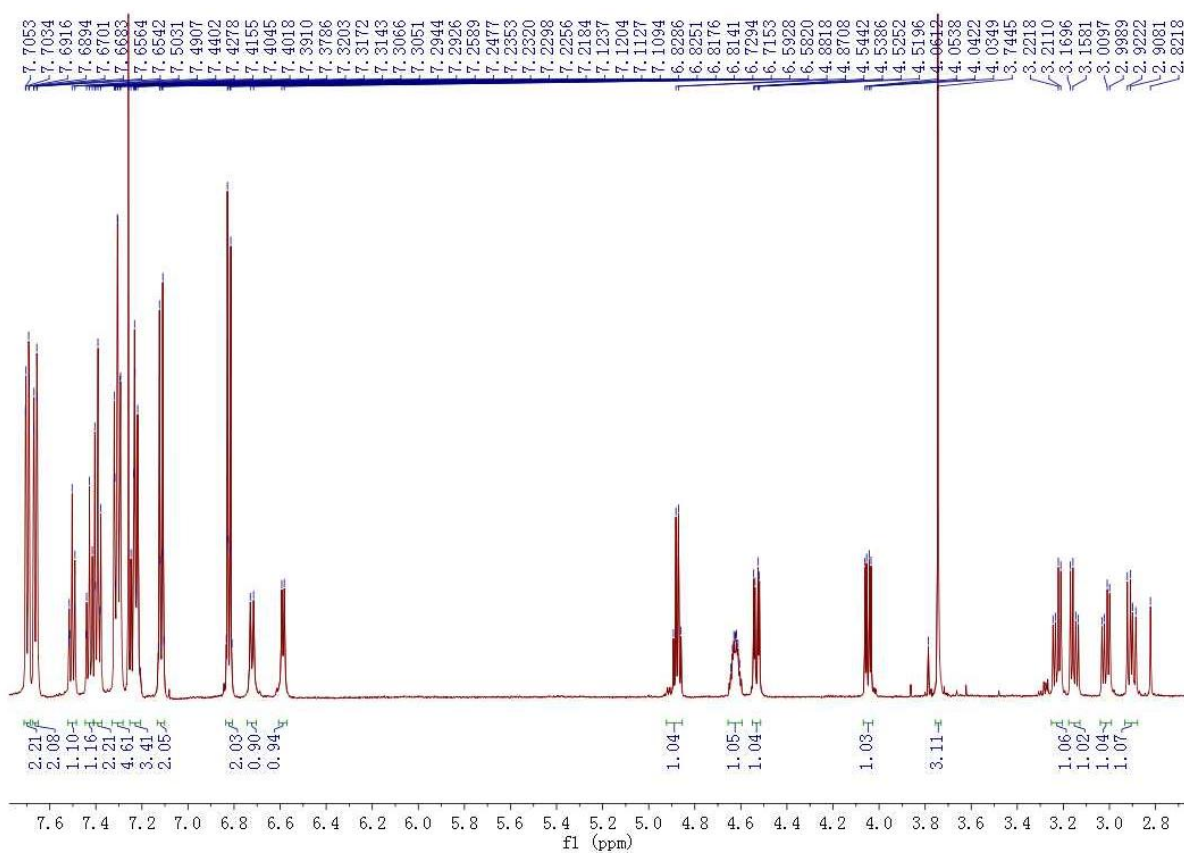**Figure S2.**  $^{13}\text{C}$  NMR (150 MHz,  $\text{DMSO-}d_6$ ) spectrum of compound 1.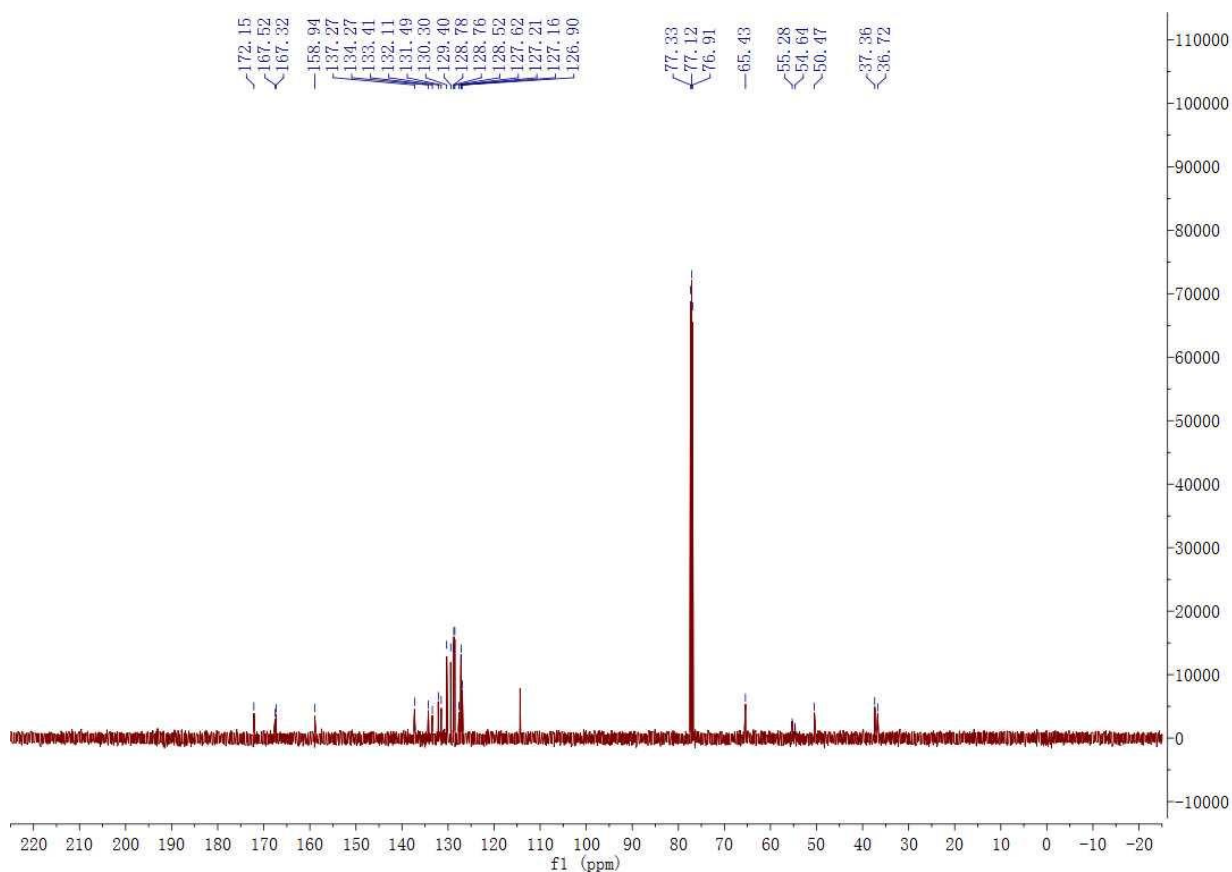

**Figure S3.** HMQC (DMSO- $d_6$ ) spectrum of compound 1.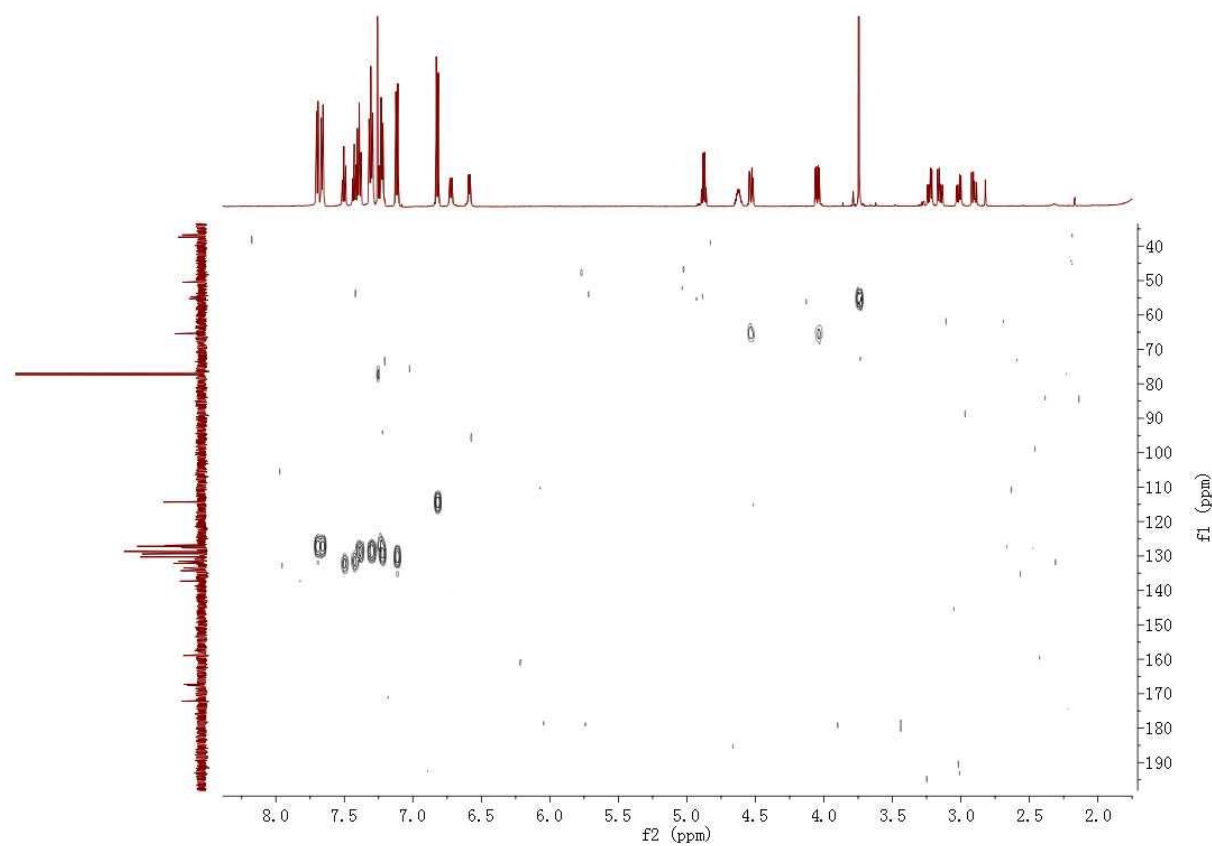**Figure S4.**  $^1\text{H}$ - $^1\text{H}$  COSY (DMSO- $d_6$ ) spectrum of compound 1.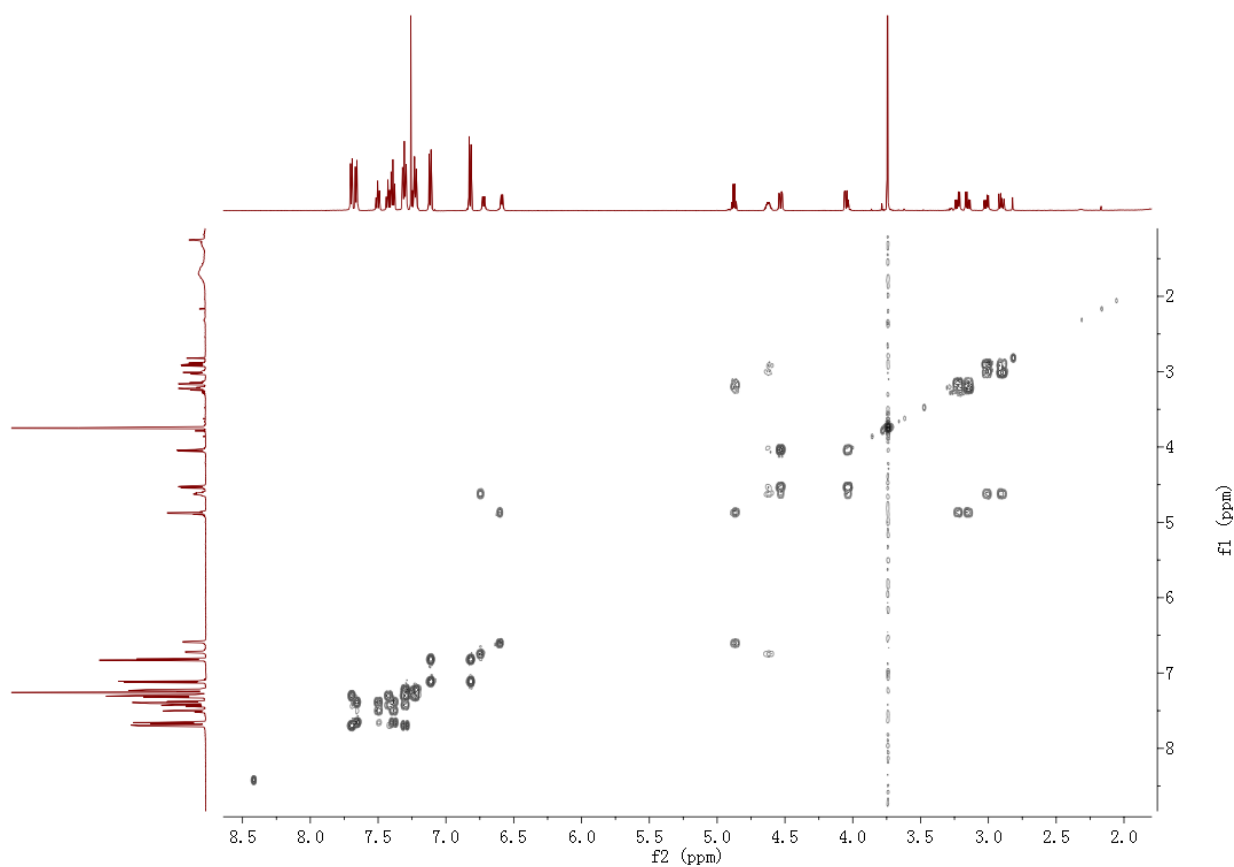

Figure S5. HMBC spectrum (DMSO- $d_6$ ) of compound 1.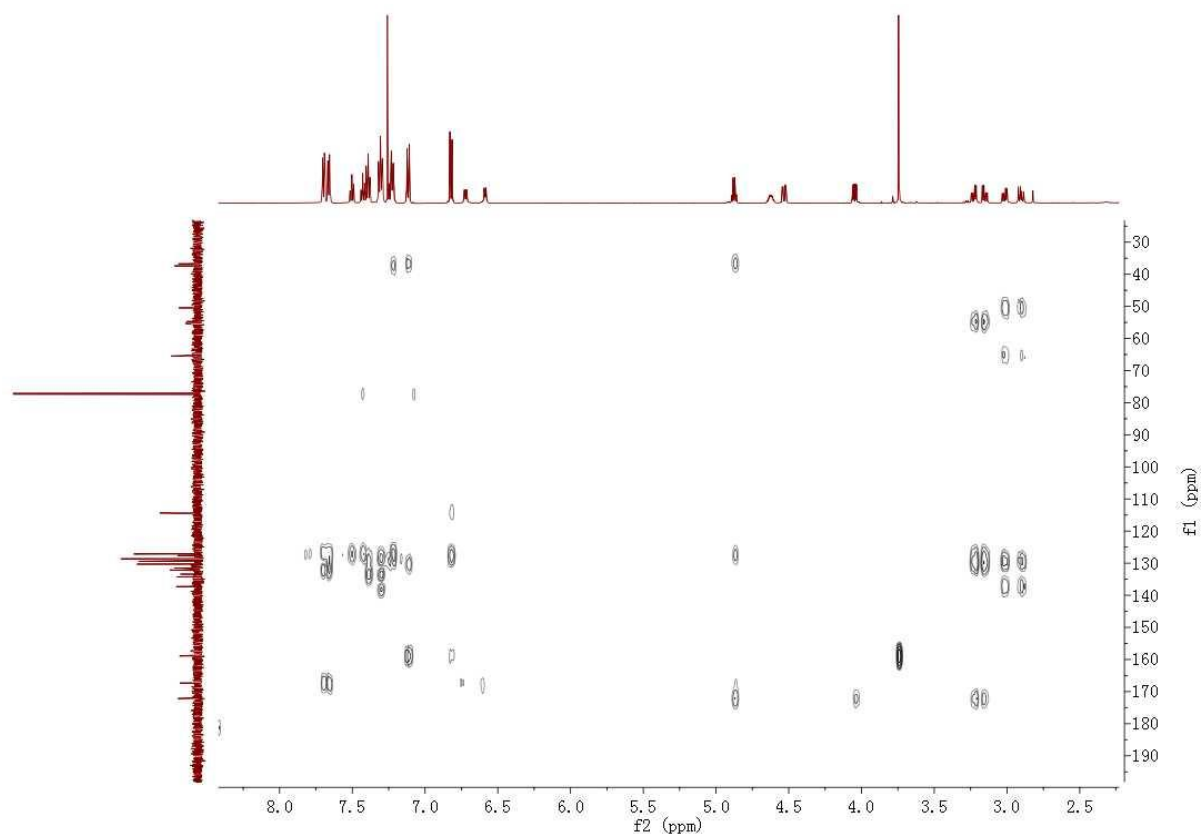

Figure S6. HRESIMS spectrum of compound 1.

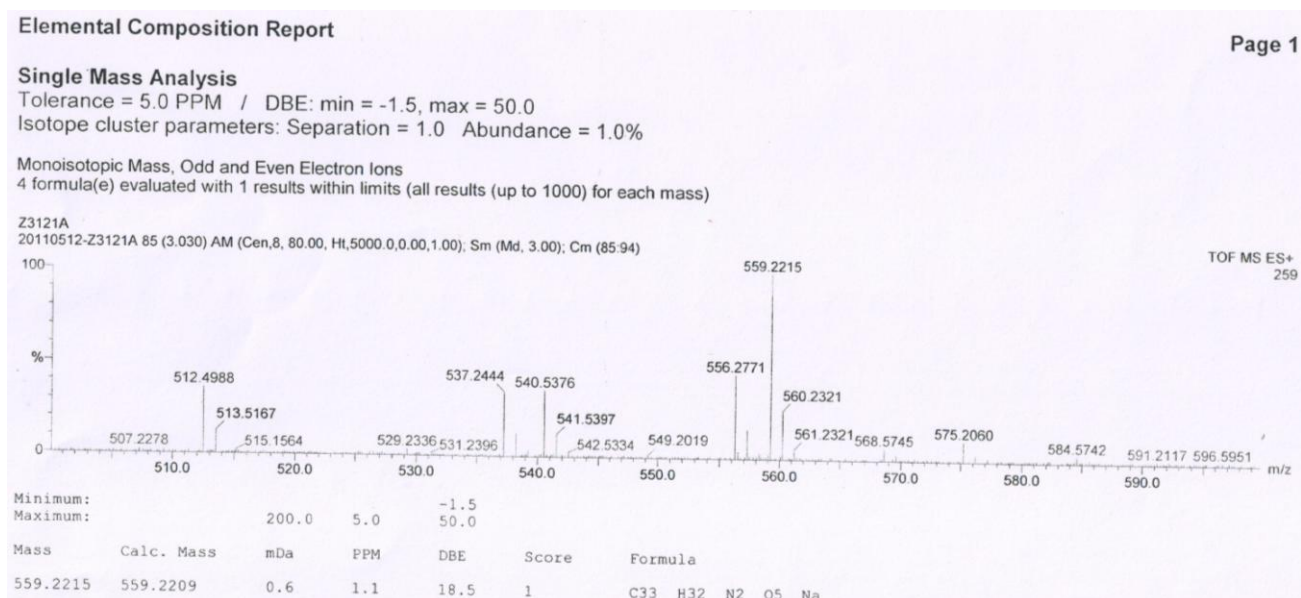

**Figure S7.**  $^1\text{H}$  NMR (600 MHz,  $\text{CDCl}_3$ ) spectrum of compound **3**.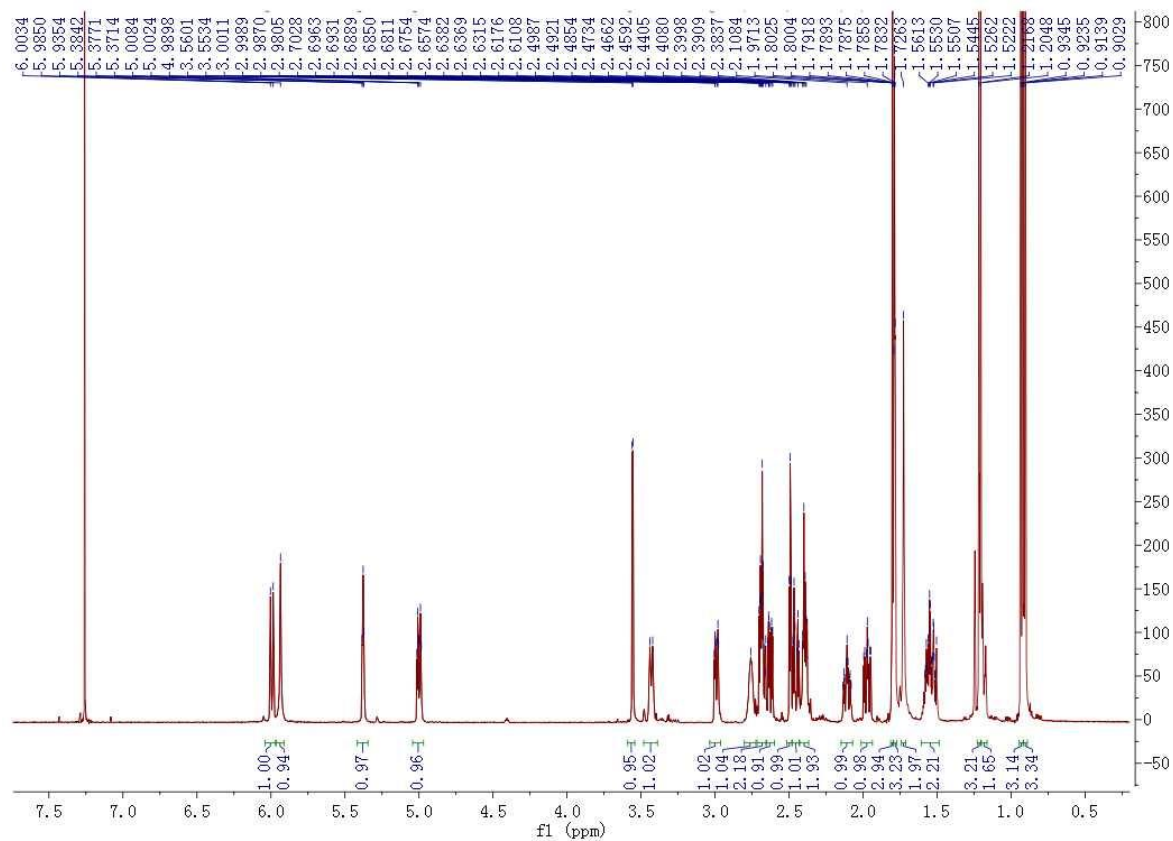**Figure S8.**  $^{13}\text{C}$  NMR (150 MHz,  $\text{CDCl}_3$ ) spectrum of compound **3**.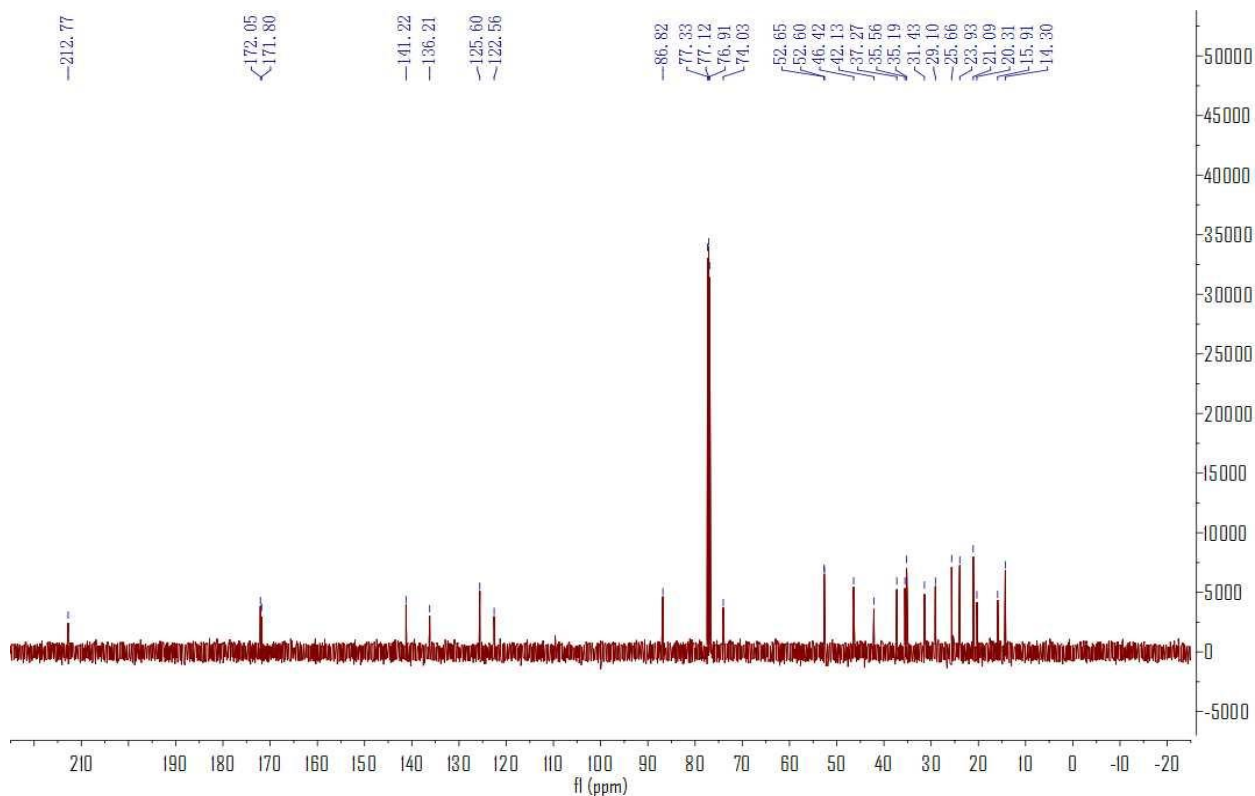

**Figure S9.** HMQC (CDCl<sub>3</sub>) spectrum of compound **3**.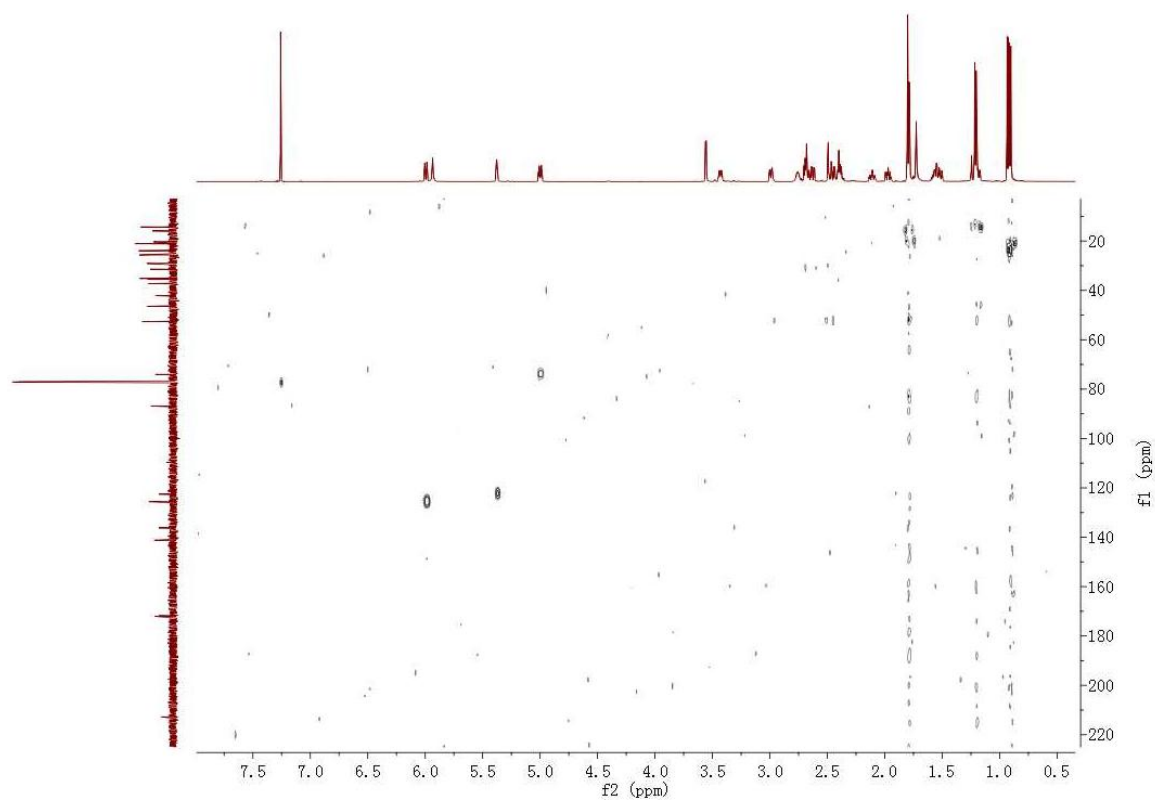**Figure S10.** <sup>1</sup>H-<sup>1</sup>H COSY (CDCl<sub>3</sub>) spectrum of compound **3**.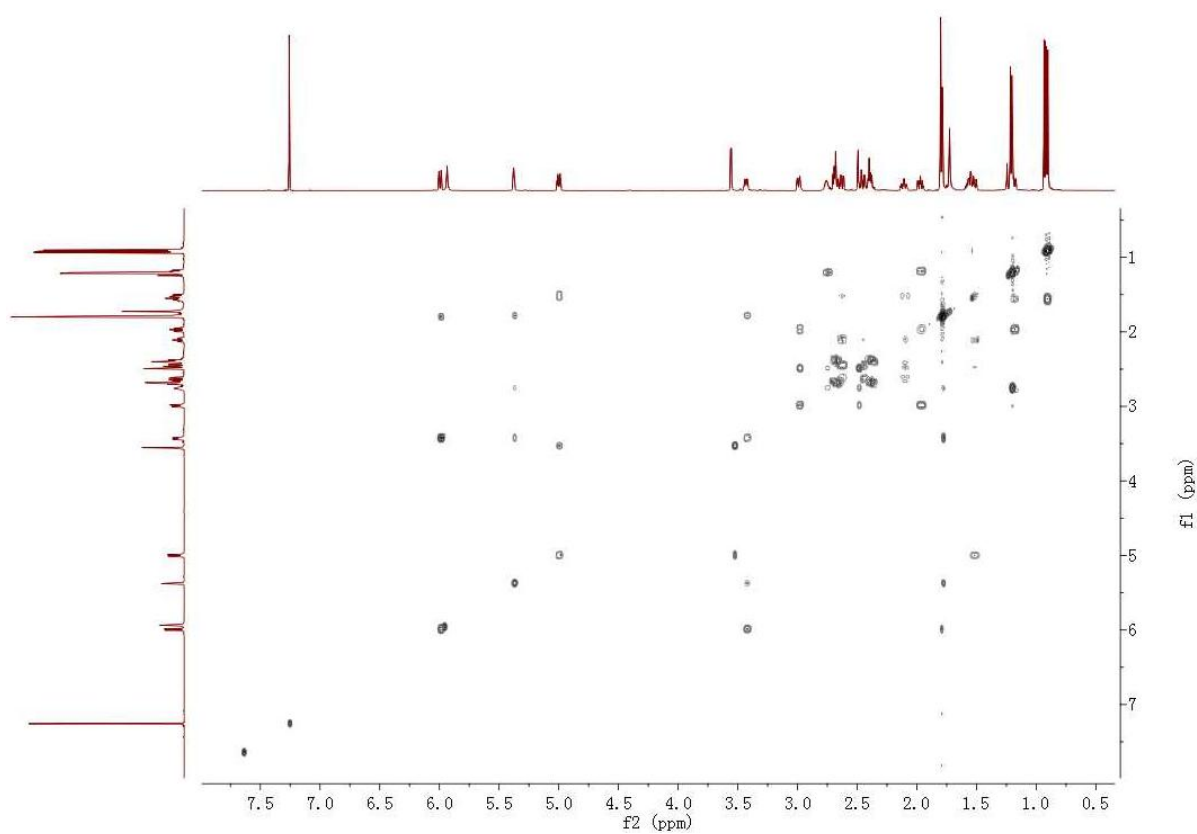

**Figure S11.** HMBC ( $\text{CDCl}_3$ ) spectrum of compound **3**.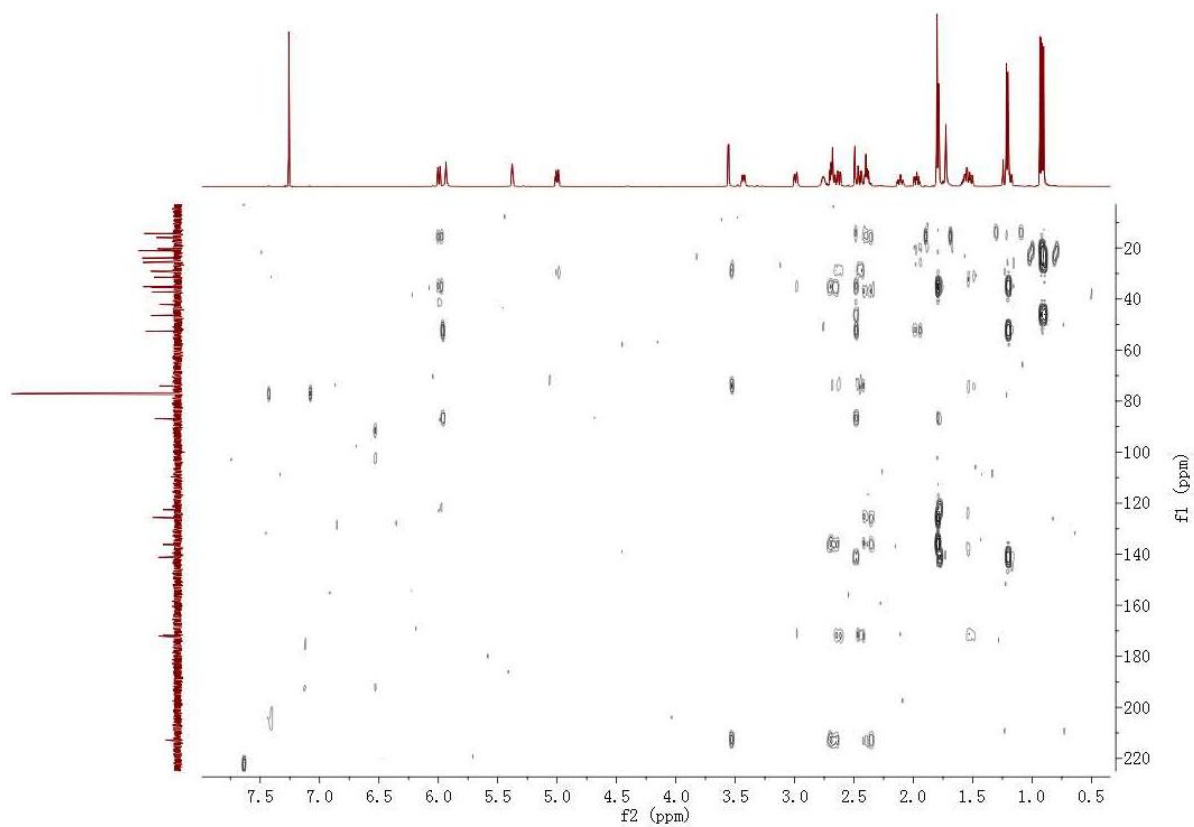**Figure S12.** NOESY ( $\text{CDCl}_3$ ) spectrum of compound **3**.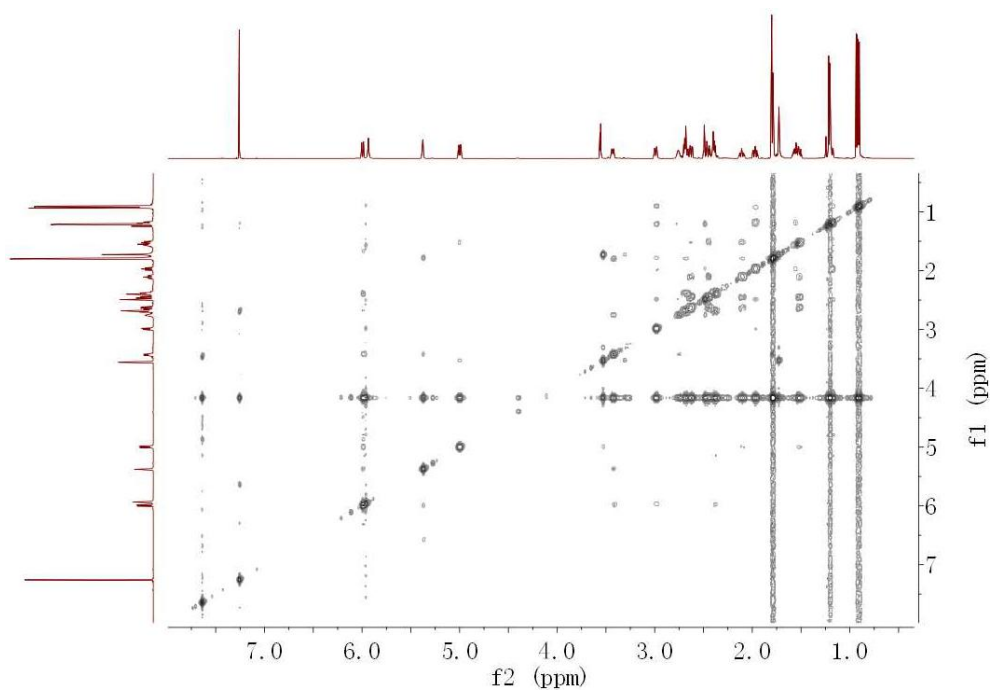



Figure S13. HRESIMS spectrum of compound 3.

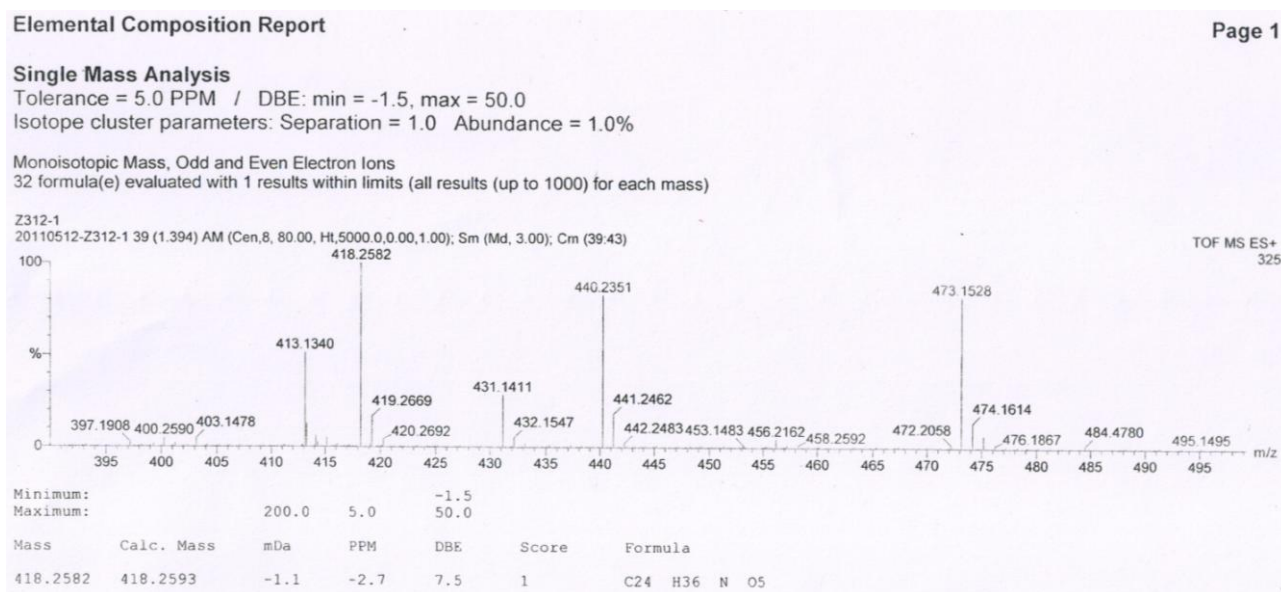Figure S14.  $^1\text{H}$  NMR (600 MHz,  $\text{CDCl}_3$ ) spectrum of compound 4.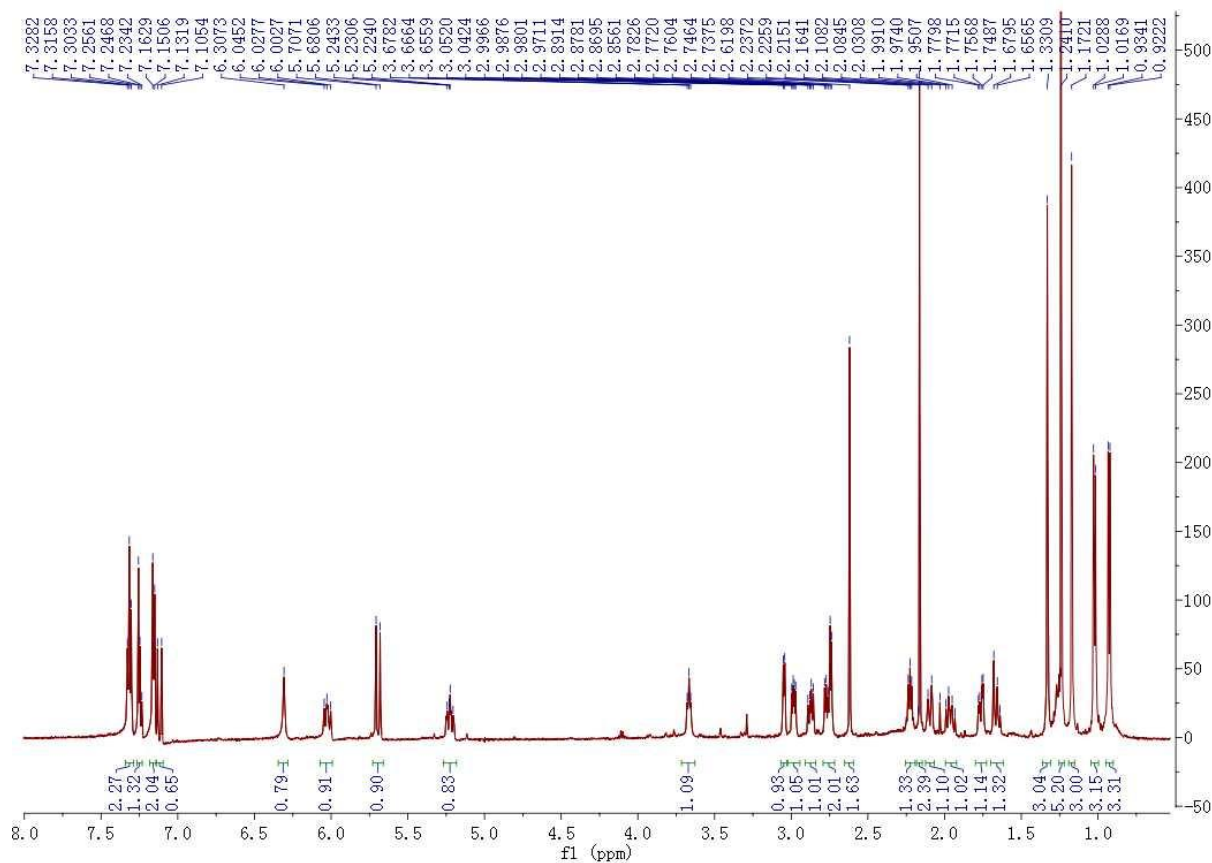



**Figure S15.**  $^{13}\text{C}$  NMR (150 MHz,  $\text{CDCl}_3$ ) spectrum of compound **4**.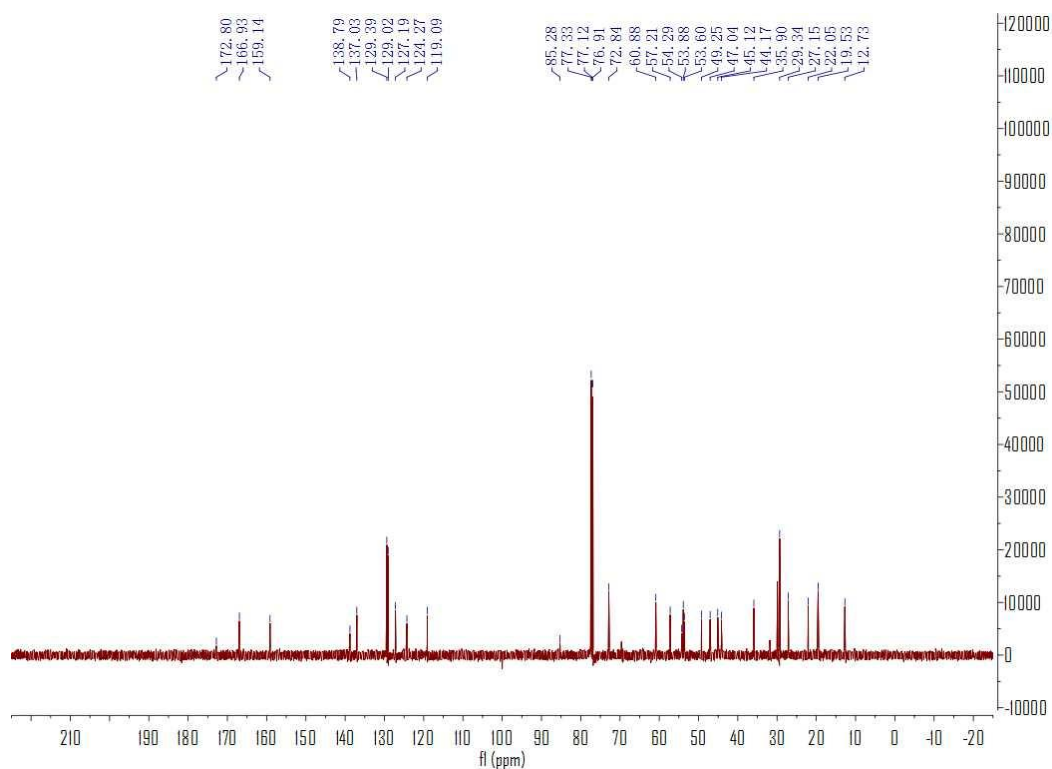**Figure S16.** HMQC ( $\text{CDCl}_3$ ) spectrum of compound **4**.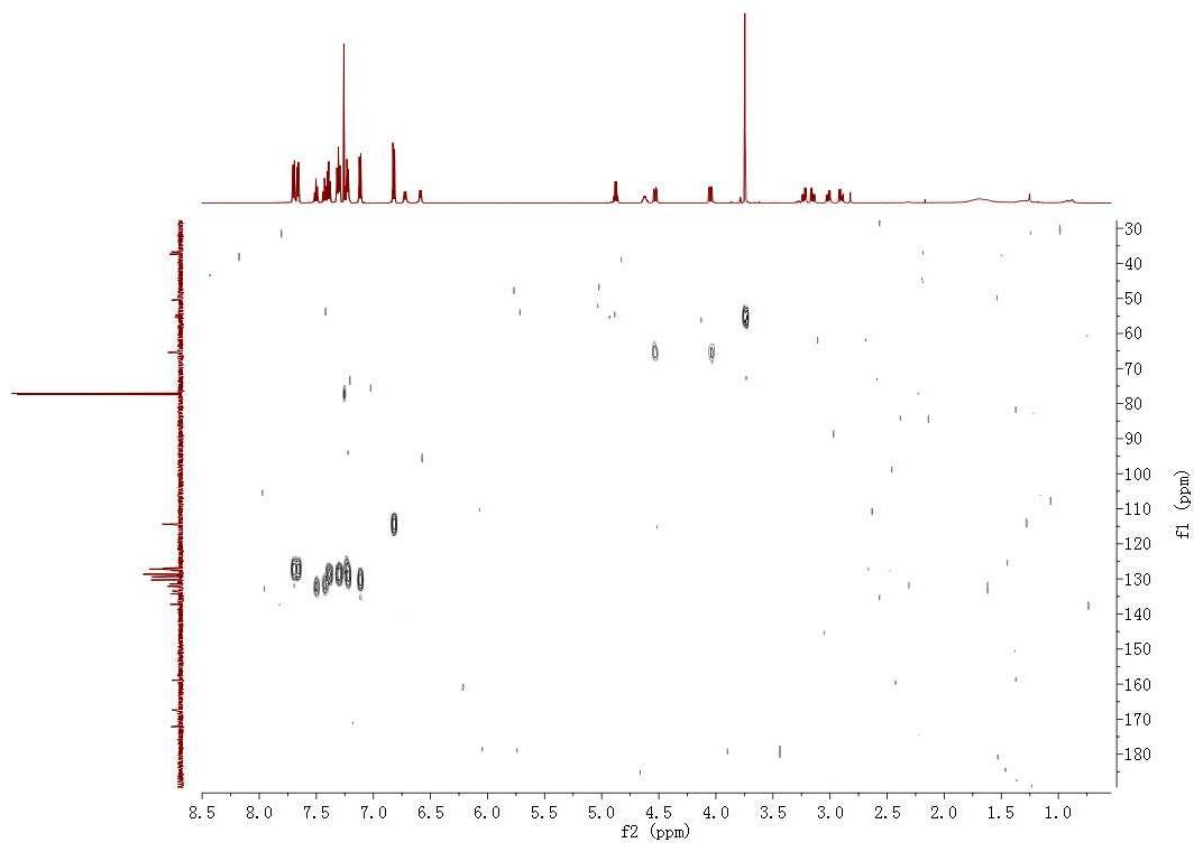

**Figure S17.**  $^1\text{H}$ - $^1\text{H}$  COSY ( $\text{CDCl}_3$ ) spectrum of compound **4**.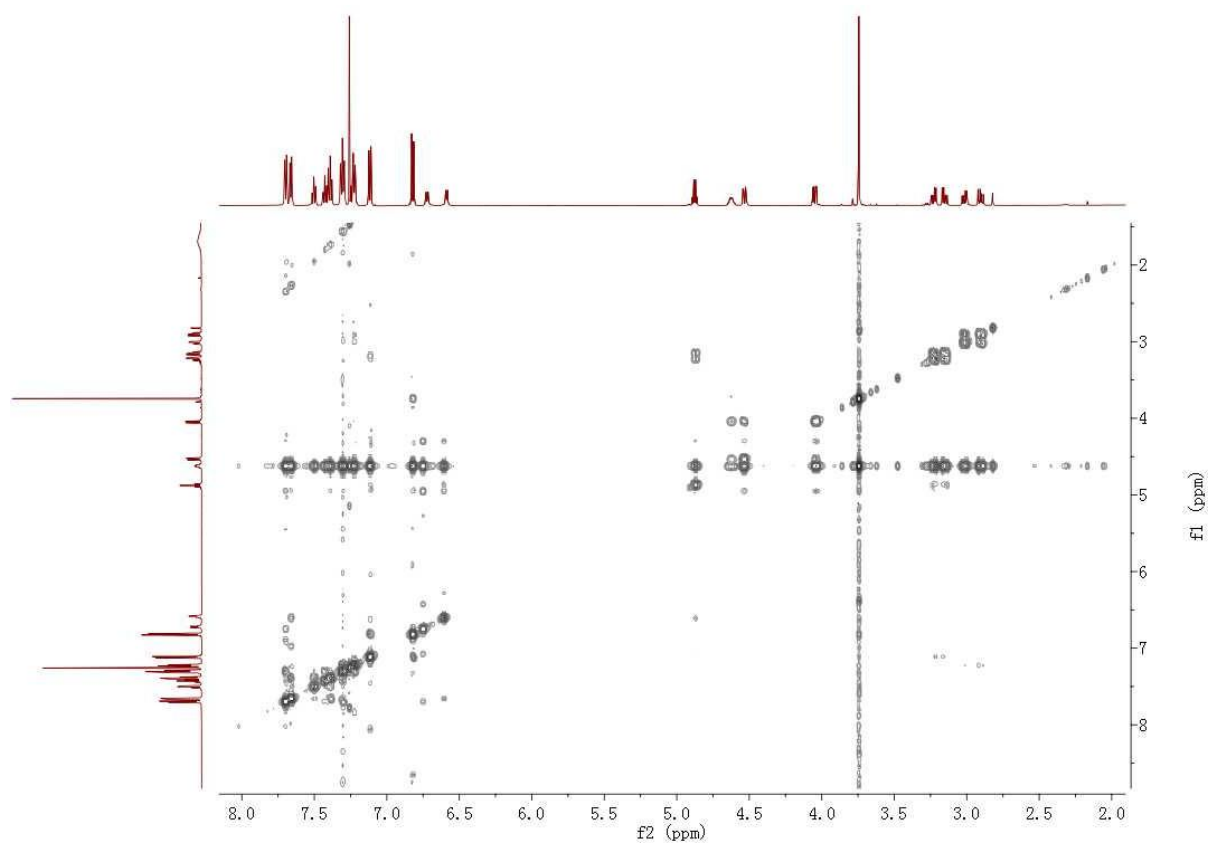**Figure S18.** HMBC ( $\text{CDCl}_3$ ) spectrum of compound **4**.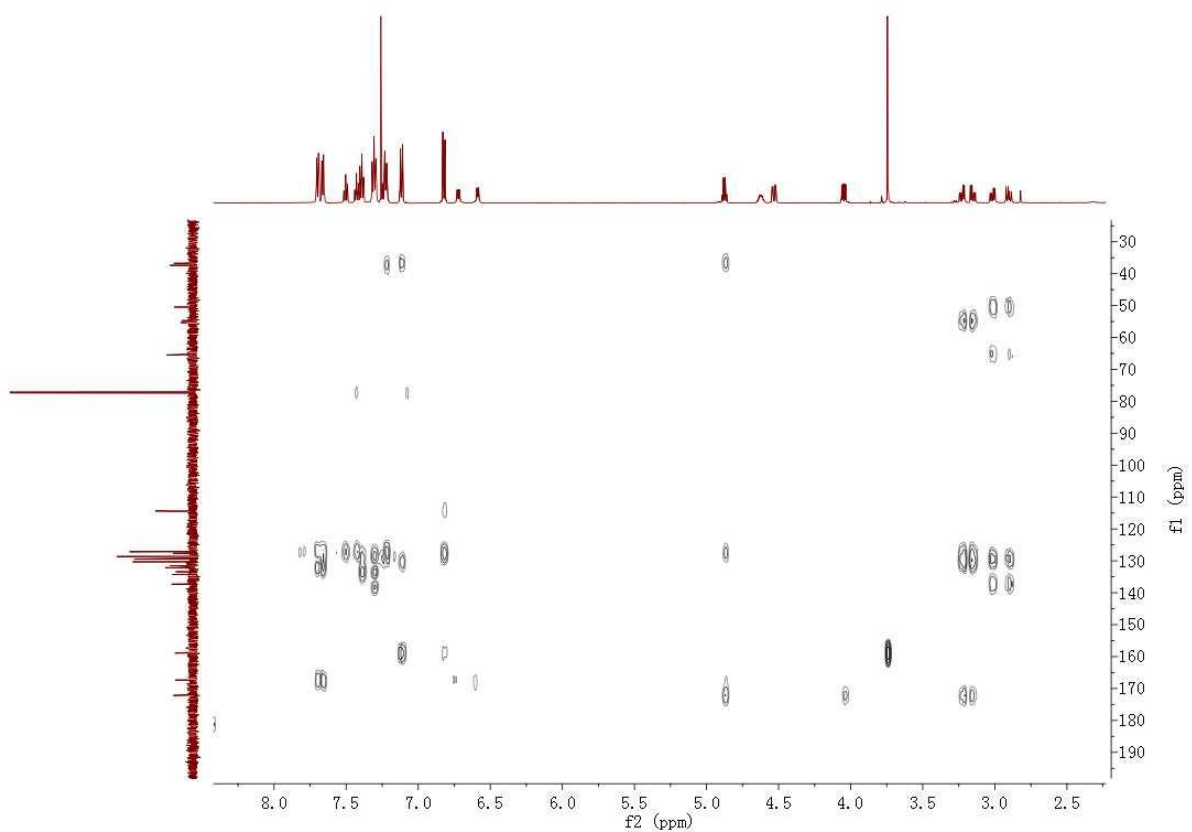

Figure S19. HRESIMS spectrum of compound 4.

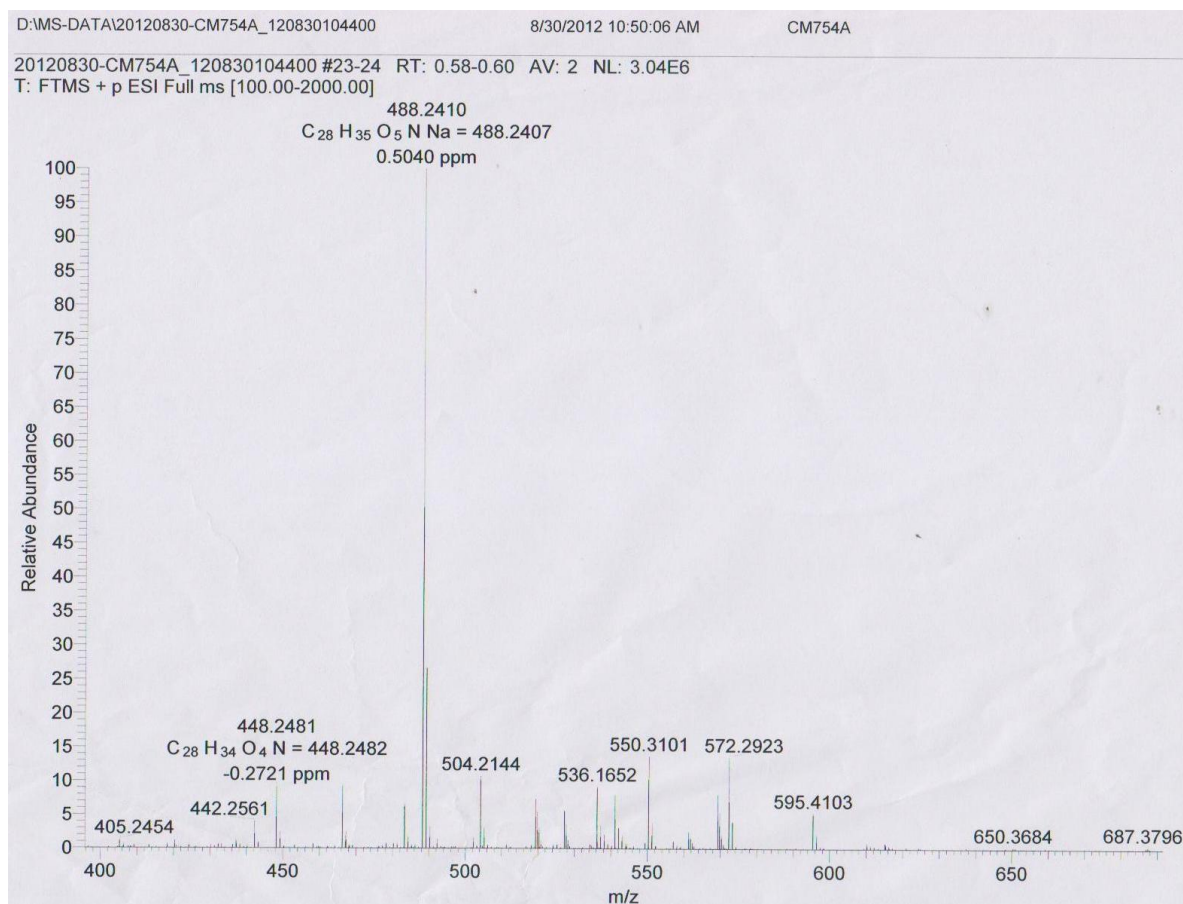Figure S20. <sup>1</sup>H NMR (400 MHz, Acetone-*d*<sub>6</sub>) spectrum of compounds 13a-1/13b-1.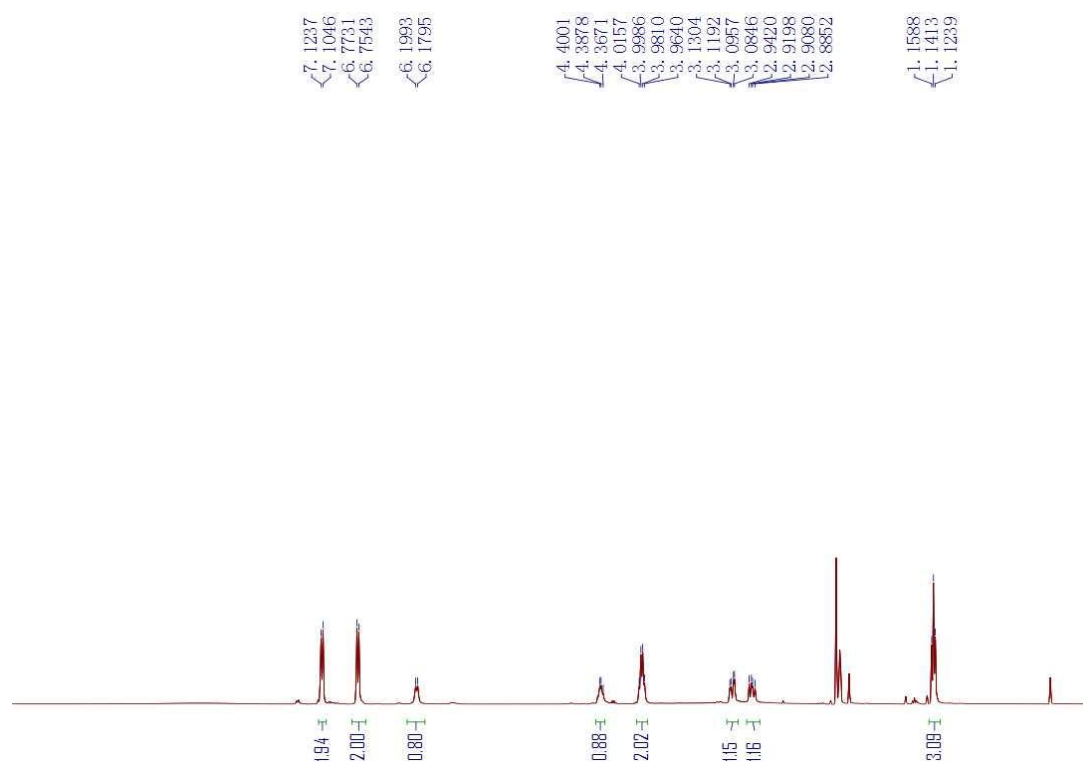

**Figure S21.** <sup>13</sup>C NMR (100 MHz, Acetone-d<sub>6</sub>) spectrum of compounds **13a-1/13b-1**.

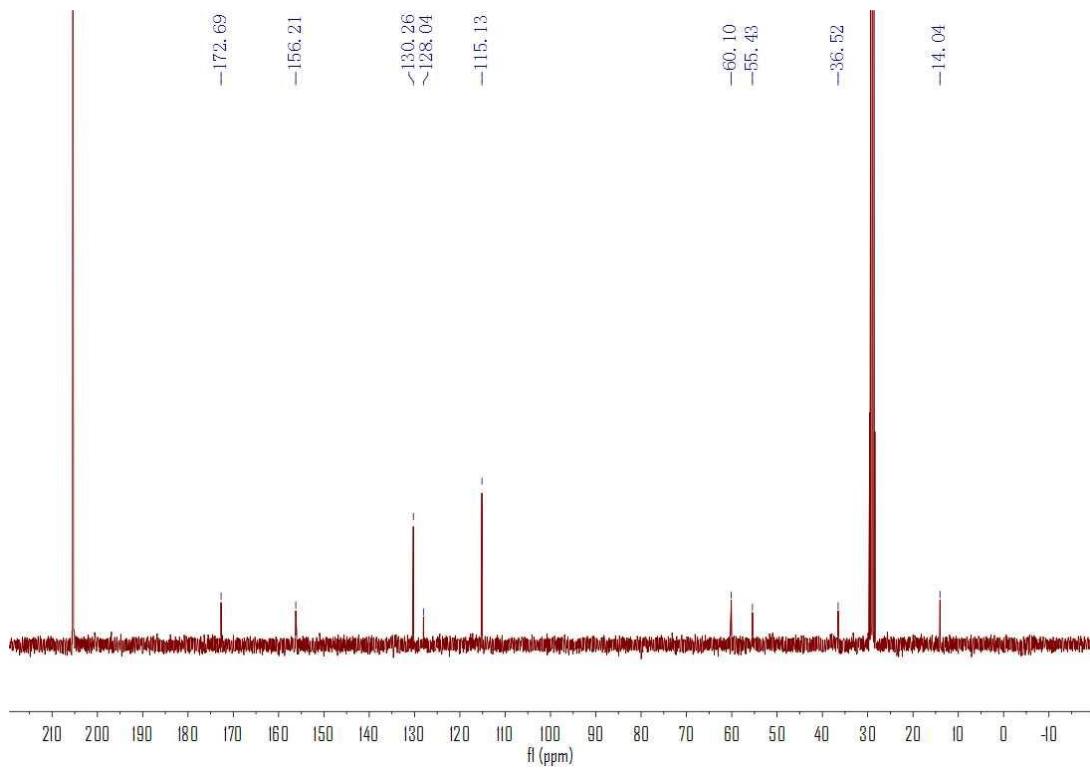

**Figure S22.** ESIMS spectrum of compounds **13a-1/13b-1**.

### Mass Spectrum List Report

| Analysis Info         |                             | Acquisition Date 3/7/2013 3:02:25 PM |            |                          |         |
|-----------------------|-----------------------------|--------------------------------------|------------|--------------------------|---------|
| Analysis Name         | D:\Data\zheng caijuan\001.d | Operator                             | bruker     |                          |         |
| Method                | DEF_MS.M                    | Instrument                           | HCT        |                          |         |
| Sample Name           | DL1                         | Comment                              |            |                          |         |
| Acquisition Parameter |                             |                                      |            |                          |         |
| Ion Source Type       | ESI                         | Ion Polarity                         | Negative   | Alternating Ion Polarity | off     |
| Mass Range Mode       | Ultra Scan                  | Scan Begin                           | 100 m/z    | Scan End                 | 500 m/z |
| Capillary Exit        | -113.5 Volt                 | Skimmer                              | -40.0 Volt | Trap Drive               | 46.3    |
| Accumulation Time     | 139 µs                      | Averages                             | 3 Spectra  | Auto MS/MS               | off     |

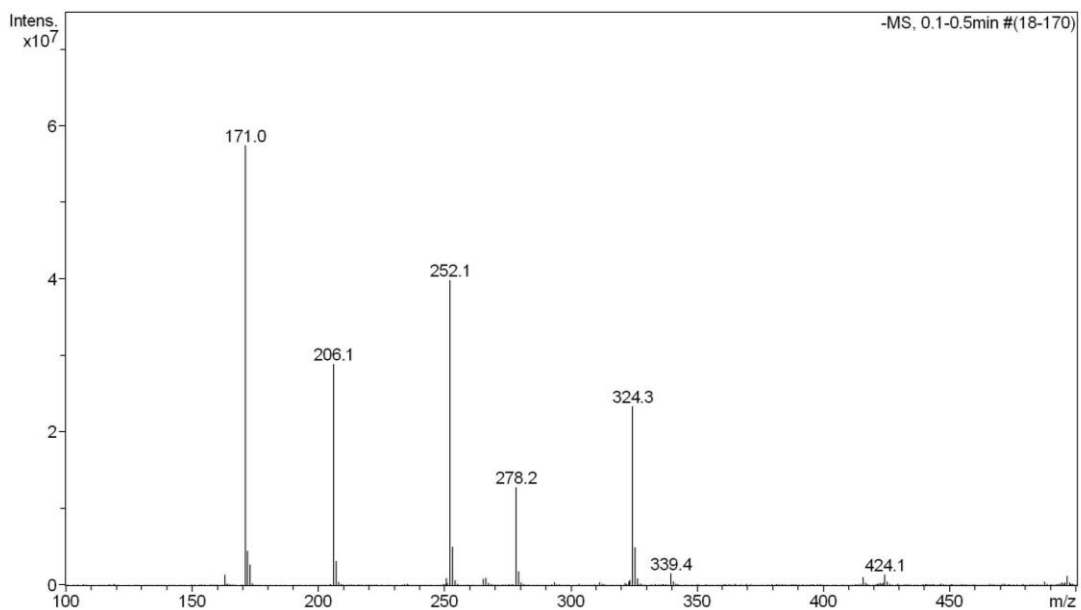

**Figure S23.**  $^1\text{H}$  NMR (400 MHz, Acetone- $d_6$ ) spectrum of compounds **13a-2/13b-2**.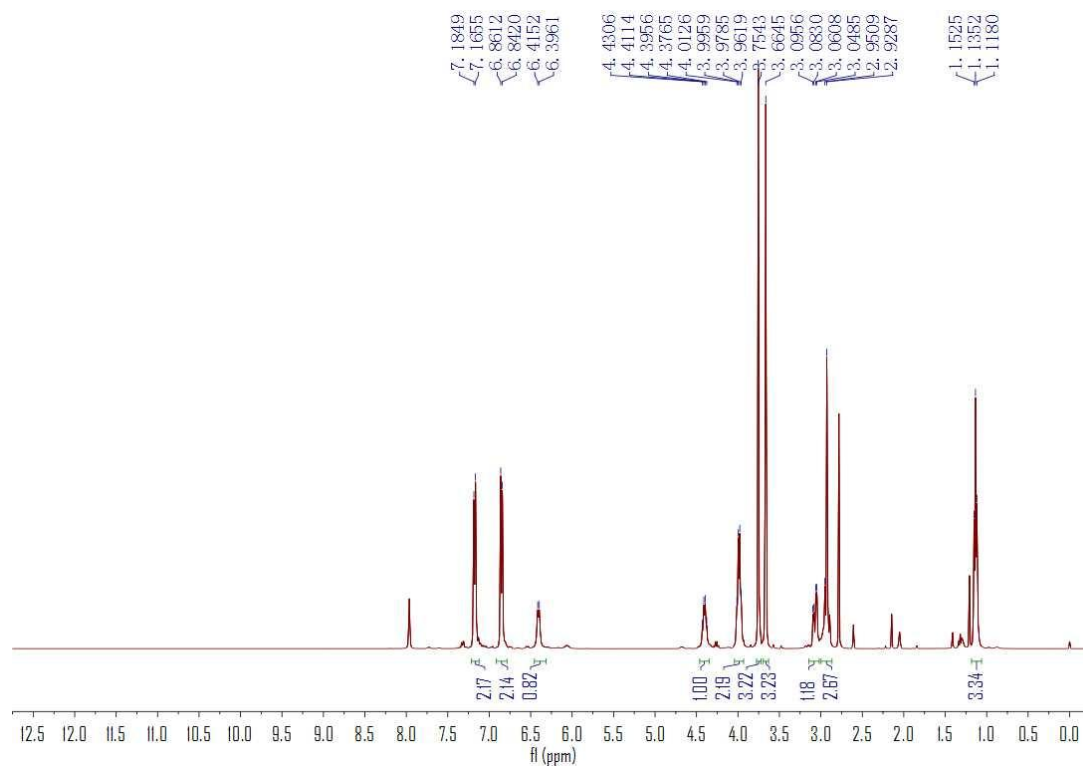**Figure S24.**  $^{13}\text{C}$  NMR (100 MHz, Acetone- $d_6$ ) spectrum of compounds **13a-2/13b-2**.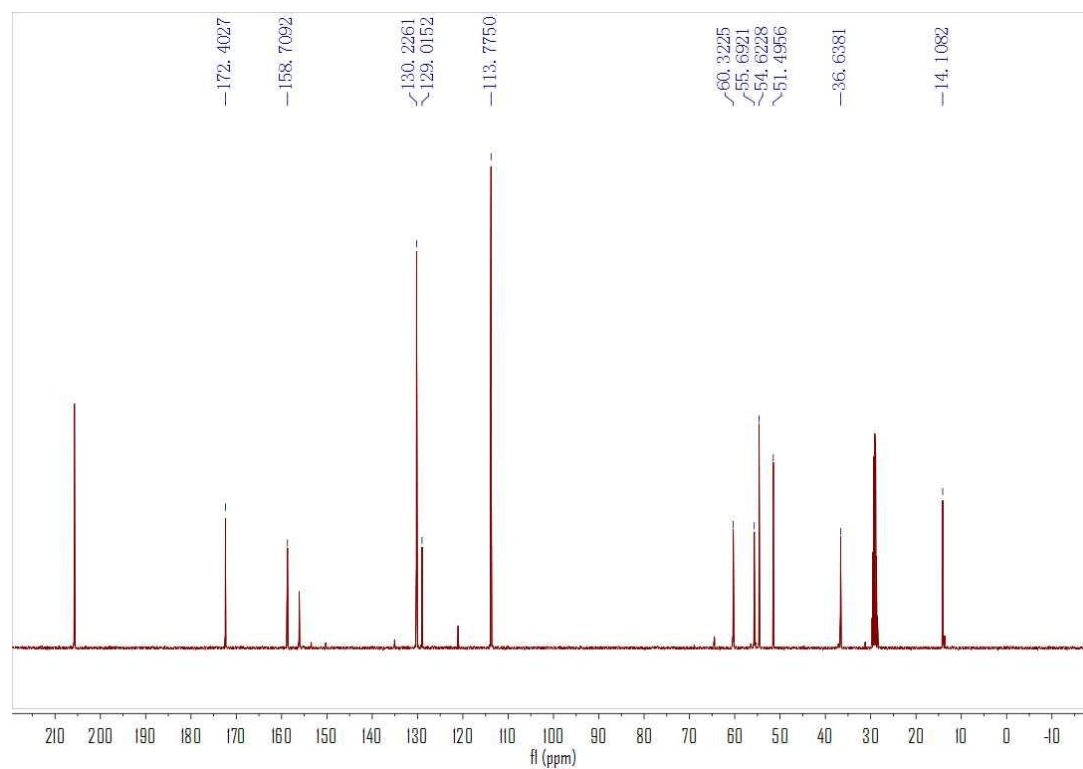

Figure S25. ESIMS spectrum of compounds 13a-2/13b-2.

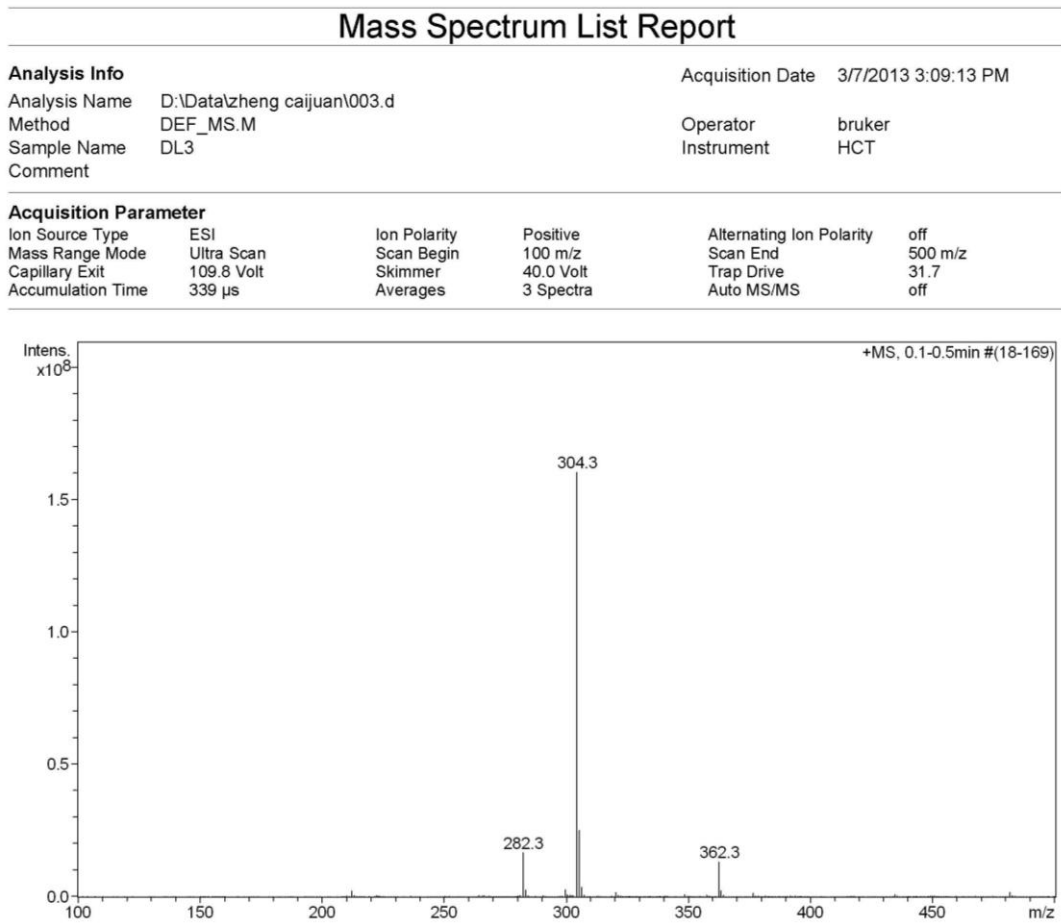

Figure S26. <sup>1</sup>H NMR (400 MHz, Acetone-*d*<sub>6</sub>) spectrum of compounds 13a-3/13b-3.

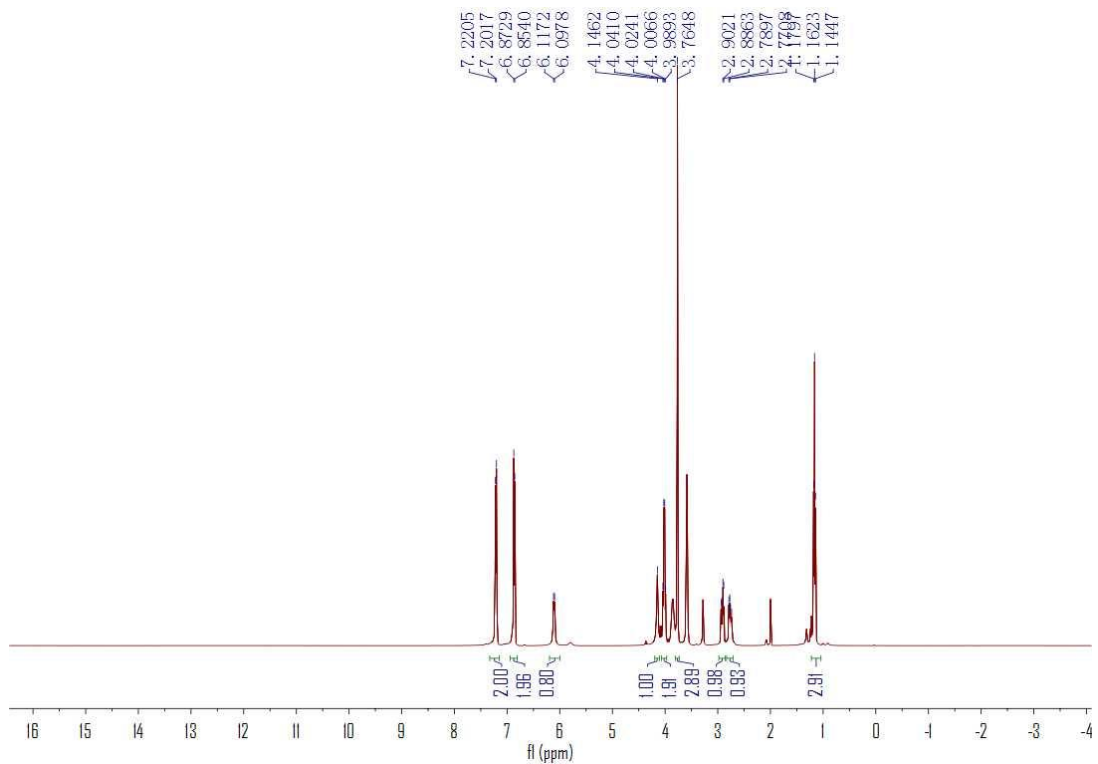

**Figure S27.**  $^{13}\text{C}$  NMR (100 MHz, Acetone- $d_6$ ) spectrum of compounds **13a-3/13b-3**.

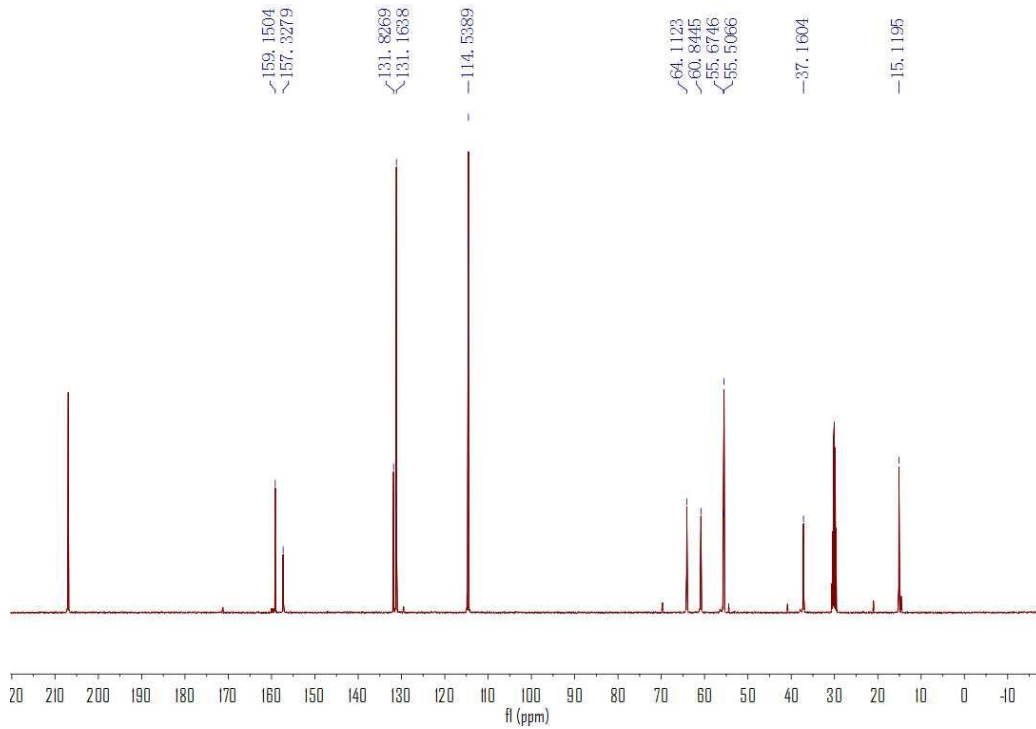

**Figure S28.** ESIMS spectrum of compounds **13a-3/13b-3**.

| Mass Spectrum List Report    |                             |              |                                      |                          |         |
|------------------------------|-----------------------------|--------------|--------------------------------------|--------------------------|---------|
| <b>Analysis Info</b>         |                             |              | Acquisition Date 3/7/2013 3:06:39 PM |                          |         |
| Analysis Name                | D:\Data\zheng caijuan\002.d |              | Operator                             | bruker                   |         |
| Method                       | DEF_MS.M                    |              | Instrument                           | HCT                      |         |
| Sample Name                  | DL2                         |              | Comment                              |                          |         |
| <b>Acquisition Parameter</b> |                             |              |                                      |                          |         |
| Ion Source Type              | ESI                         | Ion Polarity | Negative                             | Alternating Ion Polarity | off     |
| Mass Range Mode              | Ultra Scan                  | Scan Begin   | 100 m/z                              | Scan End                 | 500 m/z |
| Capillary Exit               | -113.5 Volt                 | Skimmer      | -40.0 Volt                           | Trap Drive               | 46.3    |
| Accumulation Time            | 250 $\mu\text{s}$           | Averages     | 3 Spectra                            | Auto MS/MS               | off     |

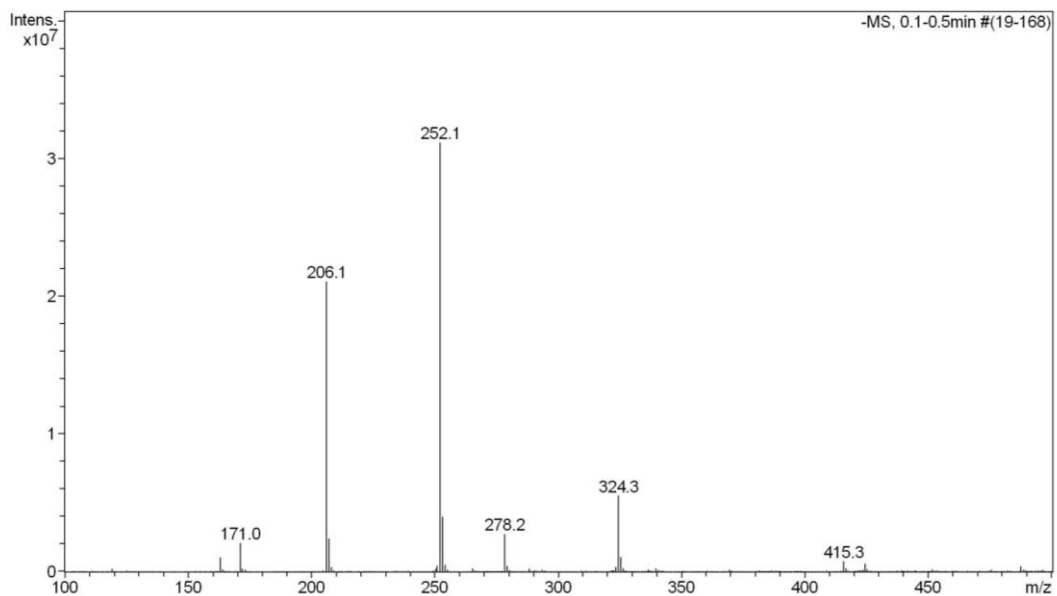



**Figure S29.**  $^1\text{H}$  NMR (400 MHz, Acetone- $d_6$ ) spectrum of compounds **14a/14b**.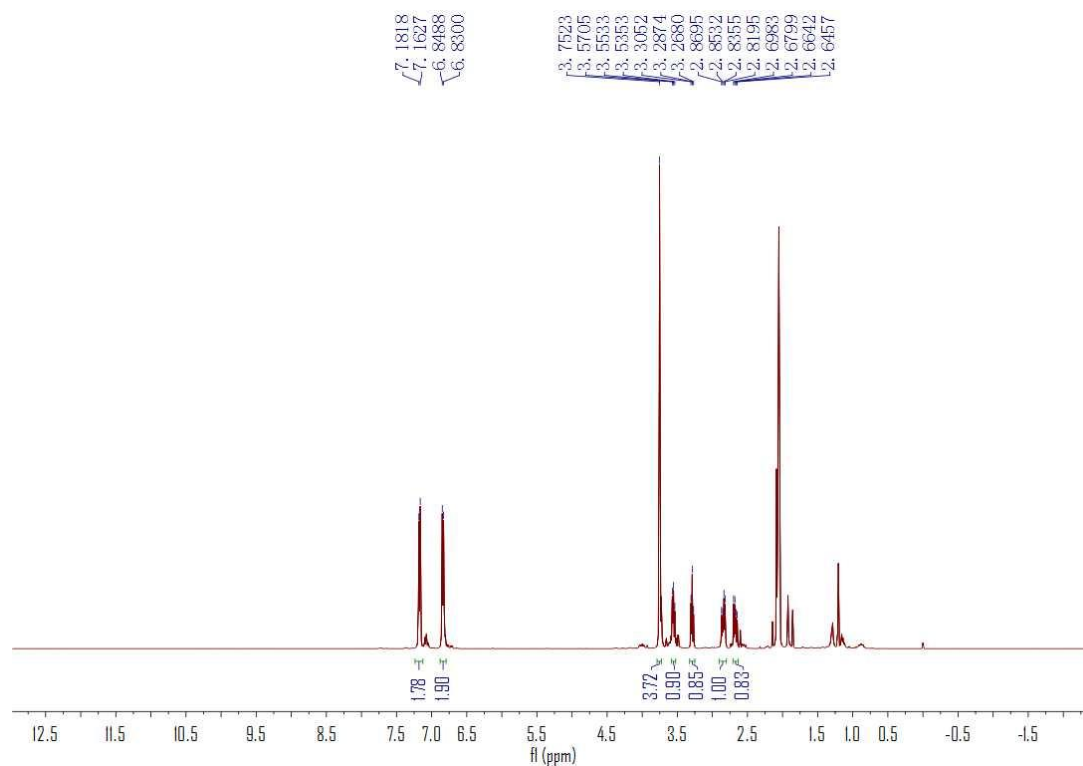**Figure S30.**  $^{13}\text{C}$  NMR (100 MHz, Acetone- $d_6$ ) spectrum of compounds **14a/14b**.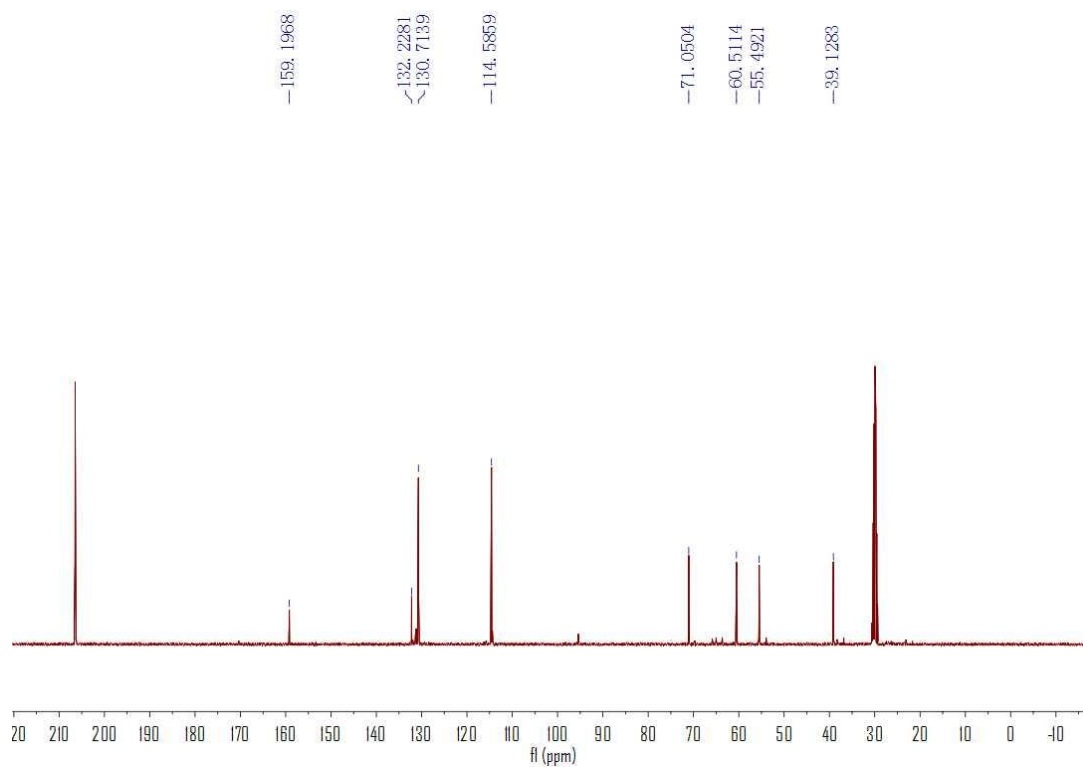

Figure S31. ESIMS spectrum of compounds 14a/14b.

| Mass Spectrum List Report    |                             |              |                                      |                          |         |
|------------------------------|-----------------------------|--------------|--------------------------------------|--------------------------|---------|
| <b>Analysis Info</b>         |                             |              | Acquisition Date 3/7/2013 3:11:22 PM |                          |         |
| Analysis Name                | D:\Data\zheng caijuan\004.d |              | Operator                             | bruker                   |         |
| Method                       | DEF_MS.M                    |              | Instrument                           | HCT                      |         |
| Sample Name                  | DL4                         |              | Comment                              |                          |         |
| <b>Acquisition Parameter</b> |                             |              |                                      |                          |         |
| Ion Source Type              | ESI                         | Ion Polarity | Positive                             | Alternating Ion Polarity | off     |
| Mass Range Mode              | Ultra Scan                  | Scan Begin   | 100 m/z                              | Scan End                 | 500 m/z |
| Capillary Exit               | 109.8 Volt                  | Skimmer      | 40.0 Volt                            | Trap Drive               | 31.7    |
| Accumulation Time            | 69 $\mu$ s                  | Averages     | 3 Spectra                            | Auto MS/MS               | off     |

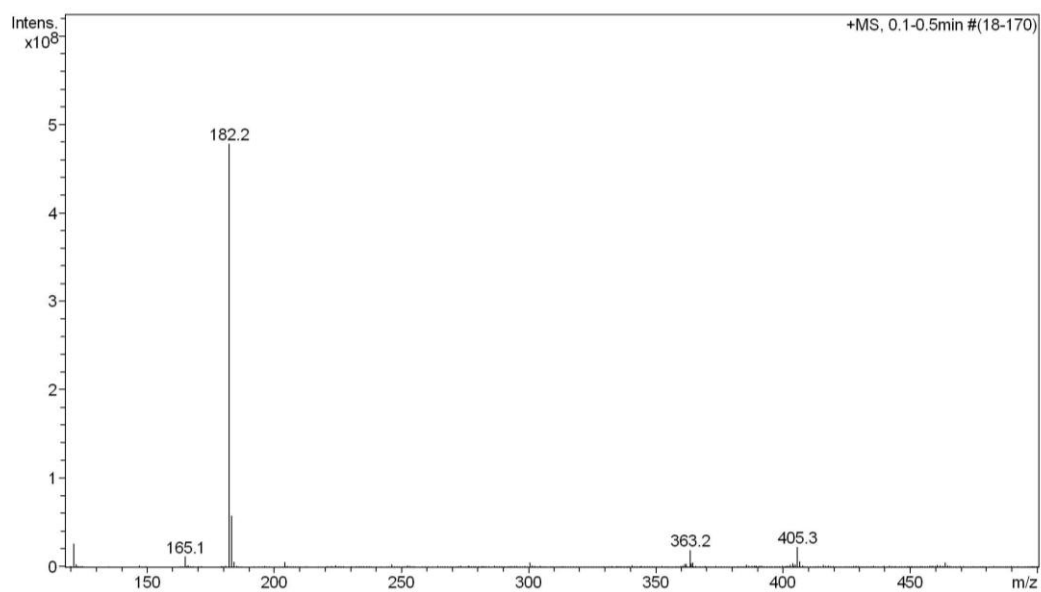

**Figure S32.** The determination of the absolute configuration of **1** by Marfey's Method (A–G) (HPLC analysis solvents: A, H<sub>2</sub>O + 0.1% TFA, B, MeCN; linear gradient: 0 min, 25% B; 40 min, 60% B; 45 min, 100% B; temperature, 30 °C; flow rate, 1 mL/min; UV detection at  $\lambda$  340 nm; FDAA, 14.2 min).

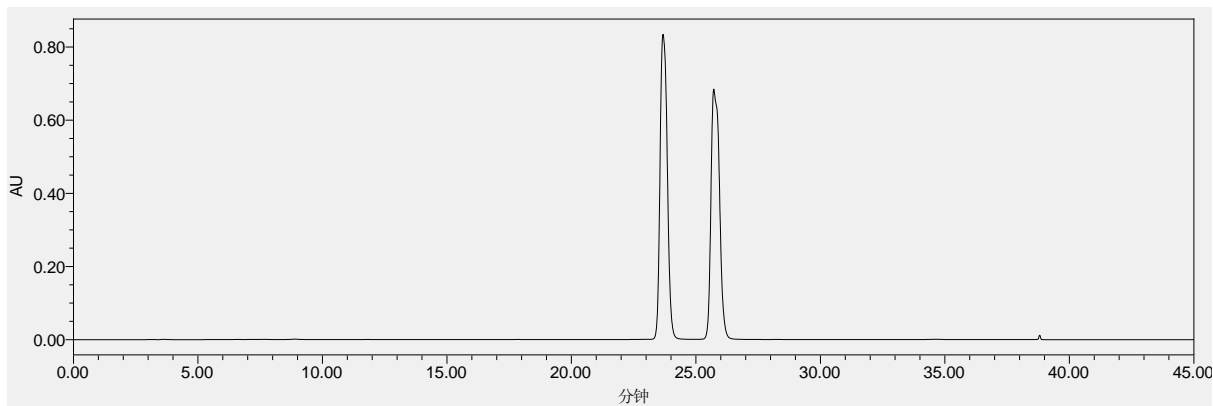

(A) FDAA derivatives of standard L- and D-Phe

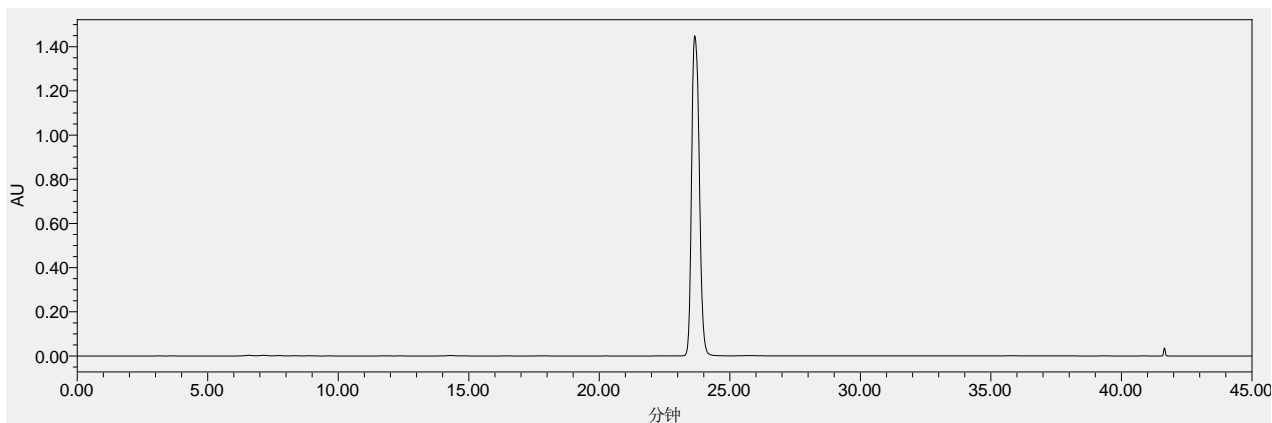

(B) FDAA derivative of standard L-Phe

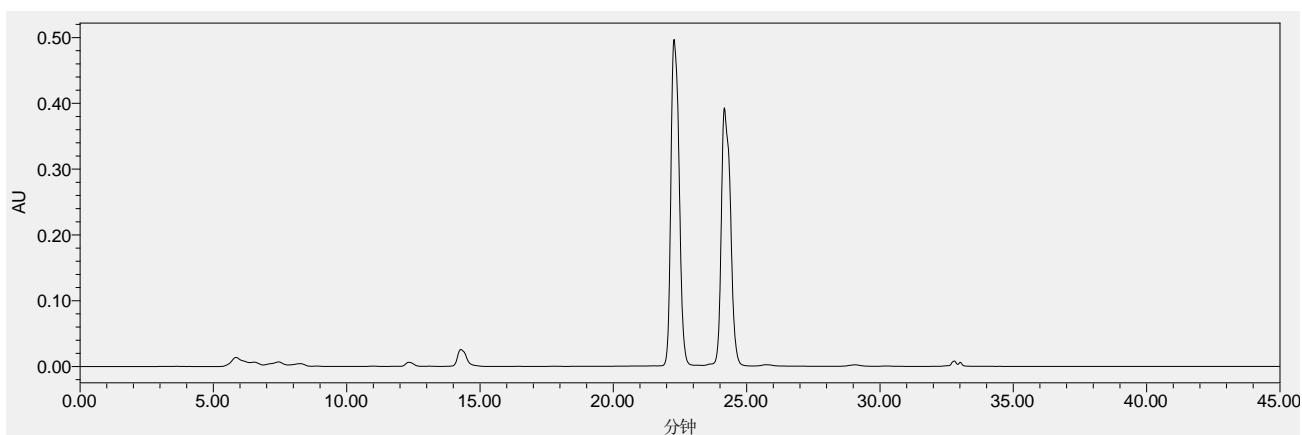

(C) FDAA derivatives of (*S*)-2-amino-3-(4-methoxyphenyl)-1-propanol and (*R*)-2-amino-3-(4-methoxyphenyl)-1-propanol (**14a**)

Figure S32. Cont.

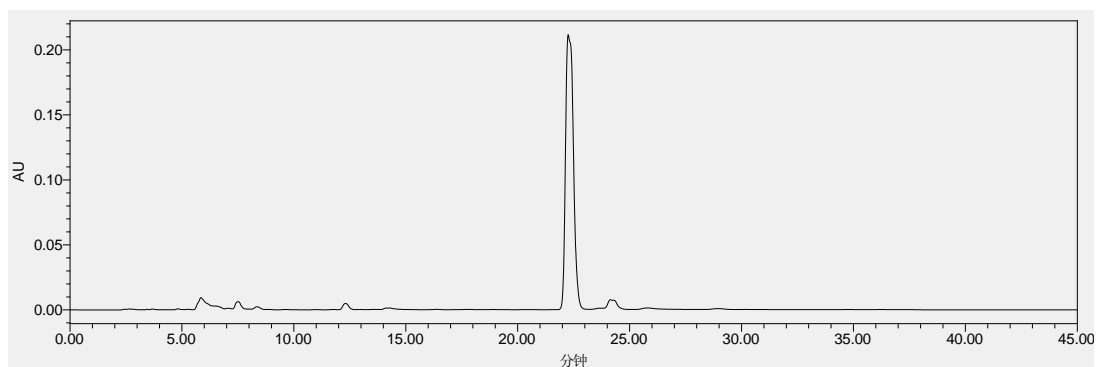**(D)** FDAA derivative of (*S*)-2-amino-3-(4-methoxyphenyl)-1-propanol (**14b**)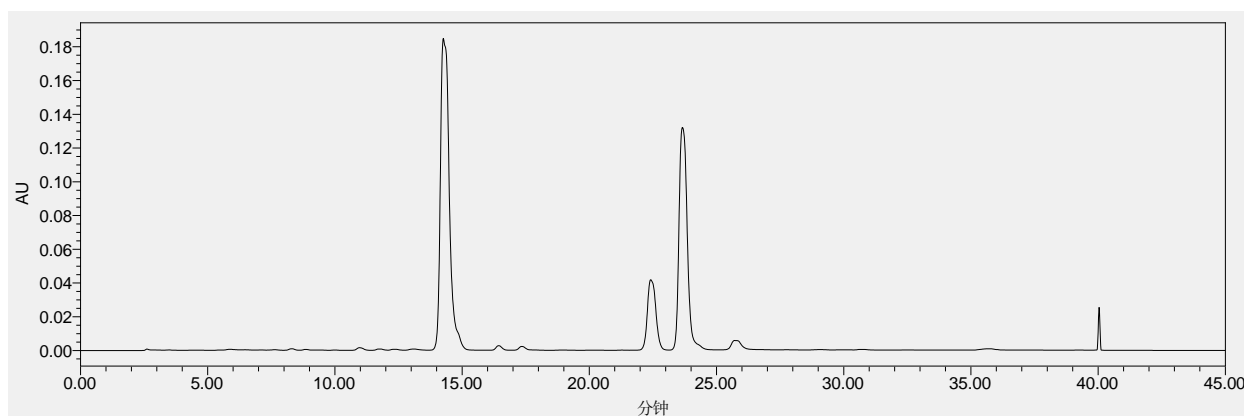**(E)** FDAA derivatives of the hydrolysates from **1**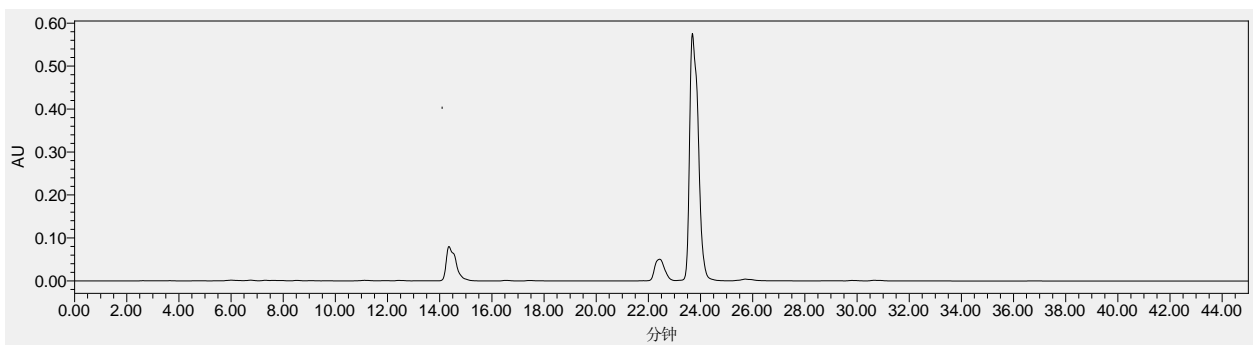**(F)** Co-injection of FDAA derivatives of the hydrolysates from **1** with FDAA derivative of standard L-Phe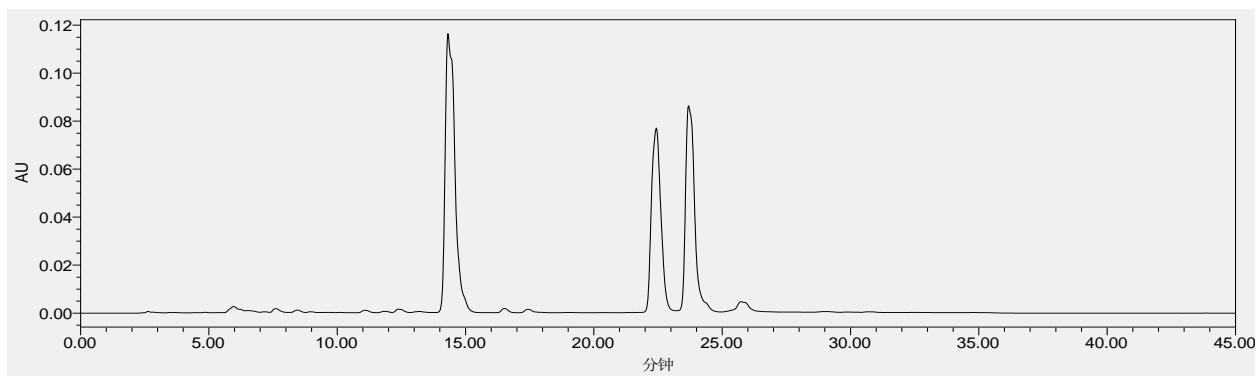**(G)** Co-injection of FDAA derivatives of the hydrolysates from **1** with FDAA derivative of (*S*)-2-amino-3-(4-methoxyphenyl)-1-propanol (**14b**)

**S1. The Spectroscopic Data of 13a-1, 13b-1, 13a-2, 13b-2, 13a-3, 13b-3, 14a and 14b**

**(S/R)-3-(4-Hydroxyphenyl)-2-[(ethoxycarbonyl)amino] propionic acid (13a-1) and (S)-3-(4-hydroxyphenyl)-2-[(ethoxycarbonyl)amino] propionic acid (13b-1):**  $^1\text{H}$  NMR (400 MHz, acetone- $d_6$ ,  $\delta$ , ppm,  $J/\text{Hz}$ ): 7.11 (2H, d,  $J = 7.6$  Hz), 6.76 (2H, d,  $J = 7.6$  Hz), 6.19 (1H, d,  $J = 8.0$  Hz), 4.42 (1H, m), 3.99 (2H, q,  $J = 7.0$  Hz), 3.11 (1H, dd,  $J = 13.9, 4.4$  Hz), 2.91 (1H, dd,  $J = 13.9, 5.2$  Hz), 1.14 (3H, t,  $J = 7.0$  Hz).  $^{13}\text{C}$  NMR (100 MHz, acetone- $d_6$ ,  $\delta$ , ppm): 172.6 (C), 172.6 (C), 156.2 (C), 130.2 (CH), 130.2 (CH), 128.0 (C), 115.1 (CH), 115.1 (CH), 60.1 ( $\text{CH}_2$ ), 55.4 (CH), 36.5 ( $\text{CH}_2$ ), 14.0 ( $\text{CH}_3$ ). ESIMS: 252.1 [ $\text{M} - \text{H}$ ] $^-$ .

**Methyl (S/R)-2-[(ethoxycarbonyl)amino]-3-(4-methoxyphenyl) propanoate (13a-2) and methyl (S)-2-[(ethoxycarbonyl)amino]-3-(4-methoxyphenyl) propanoate (13b-2):**  $^1\text{H}$  NMR (400 MHz, acetone- $d_6$ ,  $\delta$ , ppm,  $J/\text{Hz}$ ): 7.18 (2H, d,  $J = 7.8$  Hz), 6.85 (2H, d,  $J = 7.8$  Hz), 6.41 (1H, d,  $J = 7.6$  Hz), 4.40 (1H, dd,  $J = 14.0, 7.6$  Hz), 3.99 (2H, q,  $J = 6.9$  Hz), 3.75 (3H, s), 3.66 (3H, s), 3.07 (1H, dd,  $J = 13.9, 5.0$  Hz), 2.94 (1H, dd,  $J = 13.9, 8.9$  Hz), 1.14 (3H, t,  $J = 6.9$  Hz).  $^{13}\text{C}$  NMR (100 MHz, acetone- $d_6$ ,  $\delta$ , ppm): 172.4 (C), 172.4 (C), 158.1 (C), 130.2 (CH), 130.2 (CH), 129.0 (C), 113.7 (CH), 113.7 (CH), 60.3 ( $\text{CH}_2$ ), 55.6 (CH), 54.6 ( $\text{CH}_3$ ), 51.5 ( $\text{CH}_3$ ), 36.6 ( $\text{CH}_2$ ), 14.1 ( $\text{CH}_3$ ). ESIMS: 282.3 [ $\text{M} + \text{H}$ ] $^+$ .

**(S/R)-2-[(Ethoxycarbonyl)amino]-3-(4-methoxyphenyl) propan-1-ol (13a-3) and (S)-2-[(ethoxycarbonyl)amino]-3-(4-methoxyphenyl) propan-1-ol (13b-3):**  $^1\text{H}$  NMR (400 MHz, acetone- $d_6$ ,  $\delta$ , ppm,  $J/\text{Hz}$ ): 7.21 (2H, d,  $J = 7.6$  Hz), 6.86 (2H, d,  $J = 7.6$  Hz), 6.11 (1H, d,  $J = 7.8$  Hz), 4.15 (1H, m), 4.02 (2H, q,  $J = 7.0$  Hz), 3.76 (3H, s), 3.38 (2H, m), 2.91 (1H, dd,  $J = 13.6, 6.4$  Hz), 2.76 (1H, dd,  $J = 13.6, 7.8$  Hz), 1.16 (3H, t,  $J = 7.0$  Hz).  $^{13}\text{C}$  NMR (100 MHz, acetone- $d_6$ ,  $\delta$ , ppm): 159.1 (C), 157.3 (C), 131.8 (C), 131.1 (CH), 131.1 (CH), 114.5 (CH), 114.5 (CH), 64.1 ( $\text{CH}_2$ ), 60.8 ( $\text{CH}_2$ ), 55.6 (CH), 55.5 ( $\text{CH}_3$ ), 37.1 ( $\text{CH}_2$ ), 15.1 ( $\text{CH}_3$ ). ESIMS: 252.1 [ $\text{M} - \text{H}$ ] $^-$ .

**(S/R)-2-Amino-3-(4-methoxyphenyl)-1-propanol (14a) and (S)-2-amino-3-(4-methoxyphenyl)-1-propanol (14b):**  $^1\text{H}$  NMR (400 MHz, acetone- $d_6$ ,  $\delta$ , ppm,  $J/\text{Hz}$ ): 7.17 (2H, d,  $J = 7.5$  Hz), 6.84 (2H, d,  $J = 7.5$  Hz), 3.75 (3H, s), 3.55 (1H, m), 3.74 (1H, t,  $J = 7.4$  Hz), 3.29 (1H, t,  $J = 7.4$  Hz), 2.84 (1H, dd,  $J = 13.5, 6.5$  Hz), 2.67 (1H, dd,  $J = 13.5, 7.4$  Hz).  $^{13}\text{C}$  NMR (100 MHz, acetone- $d_6$ ,  $\delta$ , ppm): 159.2 (C), 132.2 (C), 130.7 (CH), 130.7 (CH), 114.5 (CH), 114.5 (CH), 71.0 ( $\text{CH}_2$ ), 60.5 (CH), 55.4 ( $\text{CH}_3$ ), 39.1 ( $\text{CH}_2$ ). ESIMS: 182.2 [ $\text{M} + \text{H}$ ] $^+$ .
