# Supplementary material for: Bioactive Phenylalanine Derivatives and Cytochalasins from the Soft Coral-Derived Fungus, Aspergillus elegans
Source: MDPI journal article supplement (doi:10.3390/md11062054), 2013-06-10
Supplement: s2 [file s2]

marinedrugs-11-02054-s001.mol
  corina  04141423193D 1   1.00000     0.00000 
CORINA 3.49 0023  12.04.2013
 43 46  0  0  0  0  0  0  0  0999 V2000
   -0.0167    1.3794    0.0096 C   0  0  0  0  0  0  0  0  0  0  0  0
    0.0021   -0.0041    0.0020 C   0  0  0  0  0  0  0  0  0  0  0  0
    1.2061   -0.6856   -0.0127 C   0  0  0  0  0  0  0  0  0  0  0  0
    2.3966    0.0113   -0.0198 C   0  0  0  0  0  0  0  0  0  0  0  0
    2.3848    1.4070   -0.0127 C   0  0  0  0  0  0  0  0  0  0  0  0
    1.1667    2.0884    0.0021 C   0  0  0  0  0  0  0  0  0  0  0  0
    3.6569    2.1603   -0.0198 C   0  0  0  0  0  0  0  0  0  0  0  0
    3.6421    3.5079   -0.0128 N   0  0  0  0  0  0  0  0  0  0  0  0
    4.9026    4.2544   -0.0199 C   0  0  0  0  0  0  0  0  0  0  0  0
    3.5876    5.9295    0.9885 O   0  0  0  0  0  0  0  0  0  0  0  0
    4.6839    5.6153    0.5894 C   0  0  0  0  0  0  0  0  0  0  0  0
    5.7070    6.4785    0.6886 O   0  0  0  0  0  0  0  0  0  0  0  0
    4.7584    2.3248   -2.6852 C   0  0  0  0  0  0  0  0  0  0  0  0
    5.7288    3.0588   -2.0290 C   0  0  0  0  0  0  0  0  0  0  0  0
    5.3932    4.4134   -1.4603 C   0  0  0  0  0  0  0  0  0  0  0  0
    5.0663    1.0823   -3.2069 C   0  0  0  0  0  0  0  0  0  0  0  0
    6.3446    0.5737   -3.0724 C   0  0  0  0  0  0  0  0  0  0  0  0
    7.3149    1.3074   -2.4158 C   0  0  0  0  0  0  0  0  0  0  0  0
    7.0070    2.5499   -1.8941 C   0  0  0  0  0  0  0  0  0  0  0  0
    5.4234    7.7711    1.2861 C   0  0  0  0  0  0  0  0  0  0  0  0
    7.1233    8.9034   -0.0591 N   0  0  0  0  0  0  0  0  0  0  0  0
    6.7013    8.6119    1.3132 C   0  0  0  0  0  0  0  0  0  0  0  0
    6.3041    9.5828   -0.8861 C   0  0  0  0  0  0  0  0  0  0  0  0
    8.0905   11.5958    1.2053 C   0  0  0  0  0  0  0  0  0  0  0  0
    7.7198   10.6967    2.1881 C   0  0  0  0  0  0  0  0  0  0  0  0
    6.4332    9.9236    2.0539 C   0  0  0  0  0  0  0  0  0  0  0  0
    9.2694   12.3058    1.3260 C   0  0  0  0  0  0  0  0  0  0  0  0
   10.0816   12.1160    2.4346 C   0  0  0  0  0  0  0  0  0  0  0  0
    9.7077   11.2129    3.4191 C   0  0  0  0  0  0  0  0  0  0  0  0
    8.5278   10.5054    3.2937 C   0  0  0  0  0  0  0  0  0  0  0  0
    5.8840   10.5803   -3.1300 C   0  0  0  0  0  0  0  0  0  0  0  0
    6.7300    9.8770   -2.2710 C   0  0  0  0  0  0  0  0  0  0  0  0
    6.2877   10.8519   -4.4209 C   0  0  0  0  0  0  0  0  0  0  0  0
    7.5278   10.4284   -4.8648 C   0  0  0  0  0  0  0  0  0  0  0  0
    8.3714    9.7312   -4.0182 C   0  0  0  0  0  0  0  0  0  0  0  0
    7.9799    9.4530   -2.7250 C   0  0  0  0  0  0  0  0  0  0  0  0
    5.2152    9.9536   -0.4933 O   0  0  0  0  0  0  0  0  0  0  0  0
    7.4888    8.0596    1.8259 H   0  0  0  0  0  0  0  0  0  0  0  0
    4.7162    1.5642   -0.0318 O   0  0  0  0  0  0  0  0  0  0  0  0
    5.6492    3.7123    0.5605 H   0  0  0  0  0  0  0  0  0  0  0  0
    2.7968    3.9836   -0.0032 H   0  0  0  0  0  0  0  0  0  0  0  0
   11.2420   12.8129    2.5555 O   0  0  0  0  0  0  0  0  0  0  0  0
   12.0281   12.5665    3.7231 C   0  0  0  0  0  0  0  0  0  0  0  0
  1  2  2  0      
  2  3  1  0      
  3  4  2  0      
  4  5  1  0      
  5  6  2  0      
  6  1  1  0      
  5  7  1  0      
  7  8  1  0      
  8  9  1  0      
 10 11  2  0      
 11  9  1  0      
 11 12  1  0      
 13 14  2  0      
 14 15  1  0      
 15  9  1  0      
 13 16  1  0      
 16 17  2  0      
 17 18  1  0      
 18 19  2  0      
 19 14  1  0      
 20 12  1  0      
 21 22  1  0      
 22 20  1  0      
 21 23  1  0      
 24 25  2  0      
 25 26  1  0      
 26 22  1  0      
 24 27  1  0      
 27 28  2  0      
 28 29  1  0      
 29 30  2  0      
 30 25  1  0      
 31 32  2  0      
 32 23  1  0      
 31 33  1  0      
 33 34  2  0      
 34 35  1  0      
 35 36  2  0      
 36 32  1  0      
 23 37  2  0      
 22 38  1  0      
  7 39  2  0      
  9 40  1  0      
  8 41  1  0      
 28 42  1  0      
 42 43  1  0      
M  STY  1   1 SUP
M  SLB  1   1   1
M  SAL   1  2  42  43
M  SBL   1  1  45
M  SMT   1 OMe
M  SBV   1 45   -5.6973    3.3413
M  END
$$$$
