# Supplementary material for: Bioactive Phenylalanine Derivatives and Cytochalasins from the Soft Coral-Derived Fungus, Aspergillus elegans
Source: MDPI journal article supplement (doi:10.3390/md11062054), 2013-06-10
Supplement: s3 [file s3]

marinedrugs-11-02054-s001.mol
  ChemDraw02071408392D

 43 46  0  0  0  0  0  0  0  0999 V2000
   -5.0013   -0.8250    0.0000 C   0  0  0  0  0  0  0  0  0  0  0  0
   -5.0013   -1.6500    0.0000 C   0  0  0  0  0  0  0  0  0  0  0  0
   -4.2868   -2.0625    0.0000 C   0  0  0  0  0  0  0  0  0  0  0  0
   -3.5724   -1.6500    0.0000 C   0  0  0  0  0  0  0  0  0  0  0  0
   -3.5724   -0.8250    0.0000 C   0  0  0  0  0  0  0  0  0  0  0  0
   -4.2868   -0.4125    0.0000 C   0  0  0  0  0  0  0  0  0  0  0  0
   -2.8579   -0.4125    0.0000 C   0  0  0  0  0  0  0  0  0  0  0  0
   -2.1434   -0.8250    0.0000 N   0  0  0  0  0  0  0  0  0  0  0  0
   -1.4289   -0.4125    0.0000 C   0  0  0  0  0  0  0  0  0  0  0  0
   -0.7145   -1.6500    0.0000 O   0  0  0  0  0  0  0  0  0  0  0  0
   -0.7145   -0.8250    0.0000 C   0  0  0  0  0  0  0  0  0  0  0  0
    0.0000   -0.4125    0.0000 O   0  0  0  0  0  0  0  0  0  0  0  0
    0.0000    0.4125    0.0000 C   0  0  0  0  0  0  0  0  0  0  0  0
   -0.7145    0.8250    0.0000 C   0  0  0  0  0  0  0  0  0  0  0  0
   -1.4289    0.4125    0.0000 C   0  0  0  0  0  0  0  0  0  0  0  0
    0.7145    0.8250    0.0000 C   0  0  0  0  0  0  0  0  0  0  0  0
    0.7145    1.6500    0.0000 C   0  0  0  0  0  0  0  0  0  0  0  0
    0.0000    2.0625    0.0000 C   0  0  0  0  0  0  0  0  0  0  0  0
   -0.7145    1.6500    0.0000 C   0  0  0  0  0  0  0  0  0  0  0  0
    0.7145   -0.8250    0.0000 C   0  0  0  0  0  0  0  0  0  0  0  0
    2.1434   -0.8250    0.0000 N   0  0  0  0  0  0  0  0  0  0  0  0
    1.4289   -0.4125    0.0000 C   0  0  0  0  0  0  0  0  0  0  0  0
    2.8579   -0.4125    0.0000 C   0  0  0  0  0  0  0  0  0  0  0  0
    2.8579    0.4125    0.0000 C   0  0  0  0  0  0  0  0  0  0  0  0
    2.1434    0.8250    0.0000 C   0  0  0  0  0  0  0  0  0  0  0  0
    1.4289    0.4125    0.0000 C   0  0  0  0  0  0  0  0  0  0  0  0
    3.5724    0.8250    0.0000 C   0  0  0  0  0  0  0  0  0  0  0  0
    3.5724    1.6500    0.0000 C   0  0  0  0  0  0  0  0  0  0  0  0
    2.8579    2.0625    0.0000 C   0  0  0  0  0  0  0  0  0  0  0  0
    2.1434    1.6500    0.0000 C   0  0  0  0  0  0  0  0  0  0  0  0
    3.5724   -1.6500    0.0000 C   0  0  0  0  0  0  0  0  0  0  0  0
    3.5724   -0.8250    0.0000 C   0  0  0  0  0  0  0  0  0  0  0  0
    4.2868   -2.0625    0.0000 C   0  0  0  0  0  0  0  0  0  0  0  0
    5.0013   -1.6500    0.0000 C   0  0  0  0  0  0  0  0  0  0  0  0
    5.0013   -0.8250    0.0000 C   0  0  0  0  0  0  0  0  0  0  0  0
    4.2868   -0.4125    0.0000 C   0  0  0  0  0  0  0  0  0  0  0  0
    2.8579   -1.2375    0.0000 O   0  0  0  0  0  0  0  0  0  0  0  0
    1.4289   -1.2375    0.0000 H   0  0  0  0  0  0  0  0  0  0  0  0
   -2.8579    0.4125    0.0000 O   0  0  0  0  0  0  0  0  0  0  0  0
   -1.4289   -1.2375    0.0000 H   0  0  0  0  0  0  0  0  0  0  0  0
   -2.1434   -1.6500    0.0000 H   0  0  0  0  0  0  0  0  0  0  0  0
    4.2863    2.0625    0.0000 O   0  0  0  0  0  0  0  0  0  0  0  0
    5.0008    1.6500    0.0000 C   0  0  0  0  0  0  0  0  0  0  0  0
  1  2  2  0      
  2  3  1  0      
  3  4  2  0      
  4  5  1  0      
  5  6  2  0      
  6  1  1  0      
  5  7  1  0      
  7  8  1  0      
  8  9  1  0      
 10 11  2  0      
 11  9  1  0      
 11 12  1  0      
 13 14  2  0      
 14 15  1  0      
 15  9  1  0      
 13 16  1  0      
 16 17  2  0      
 17 18  1  0      
 18 19  2  0      
 19 14  1  0      
 20 12  1  0      
 21 22  1  0      
 22 20  1  0      
 21 23  1  0      
 24 25  2  0      
 25 26  1  0      
 26 22  1  0      
 24 27  1  0      
 27 28  2  0      
 28 29  1  0      
 29 30  2  0      
 30 25  1  0      
 31 32  2  0      
 32 23  1  0      
 31 33  1  0      
 33 34  2  0      
 34 35  1  0      
 35 36  2  0      
 36 32  1  0      
 23 37  2  0      
 22 38  1  1      
  7 39  2  0      
  9 40  1  6      
  8 41  1  0      
 28 42  1  0      
 42 43  1  0      
M  STY  1   1 SUP
M  SLB  1   1   1
M  SAL   1  2  42  43
M  SBL   1  1  45
M  SMT   1 OMe
M  SBV   1 45   -5.6973    3.3413
M  END
