# Supplementary material for: Bioactive Phenylalanine Derivatives and Cytochalasins from the Soft Coral-Derived Fungus, Aspergillus elegans
Source: MDPI journal article supplement (doi:10.3390/md11062054), 2013-06-10
Supplement: s4 [file s4]

marinedrugs-11-02054-s002.mol
  corina  04141423203D 1   1.00000     0.00000 
CORINA 3.49 0023  12.04.2013
 32 34  0  0  0  0  0  0  0  0999 V2000
    1.4045    0.6605   -0.7241 C   0  0  0  0  0  0  0  0  0  0  0  0
    1.5136   -0.8577   -0.5693 C   0  0  0  0  0  0  0  0  0  0  0  0
    3.1991    1.0677    0.9659 C   0  0  0  0  0  0  0  0  0  0  0  0
    2.7753    1.2972   -0.4862 C   0  0  0  0  0  0  0  0  0  0  0  0
    4.7661    4.0195    1.4691 O   0  0  0  0  0  0  0  0  0  0  0  0
    4.4463    2.7758    2.1452 C   0  0  0  0  0  0  0  0  0  0  0  0
    4.6274    1.5929    1.1849 C   0  0  0  0  0  0  0  0  0  0  0  0
    5.3362    2.6088    3.3717 C   0  0  0  0  0  0  0  0  0  0  0  0
    5.0451    1.2801    4.0283 C   0  0  0  0  0  0  0  0  0  0  0  0
    5.1182    0.2296    3.2224 C   0  0  0  0  0  0  0  0  0  0  0  0
    5.4957    0.4971    1.7858 C   0  0  0  0  0  0  0  0  0  0  0  0
    3.8140    4.9675    1.4689 C   0  0  0  0  0  0  0  0  0  0  0  0
    4.0812    6.3043    0.8271 C   0  0  0  0  0  0  0  0  0  0  0  0
    5.2166    3.7669    4.3022 C   0  0  0  0  0  0  0  0  0  0  0  0
    5.0171    7.1189    1.7231 C   0  0  0  0  0  0  0  0  0  0  0  0
    4.2598    7.5686    2.9740 C   0  0  0  0  0  0  0  0  0  0  0  0
    4.7616    6.8045    4.1714 C   0  0  0  0  0  0  0  0  0  0  0  0
    3.8007    6.3625    5.2444 C   0  0  0  0  0  0  0  0  0  0  0  0
    4.4243    5.2253    6.0557 C   0  0  0  0  0  0  0  0  0  0  0  0
    4.3410    3.9425    5.2475 C   0  0  0  0  0  0  0  0  0  0  0  0
    2.7430    4.7478    1.9833 O   0  0  0  0  0  0  0  0  0  0  0  0
    5.9368    6.5453    4.2712 O   0  0  0  0  0  0  0  0  0  0  0  0
    2.8637    7.3180    2.8006 O   0  0  0  0  0  0  0  0  0  0  0  0
    6.3832    2.5719    3.0092 H   0  0  0  0  0  0  0  0  0  0  0  0
    3.2590    2.9561    5.5887 C   0  0  0  0  0  0  0  0  0  0  0  0
    4.8380   -1.1657    3.7178 C   0  0  0  0  0  0  0  0  0  0  0  0
    5.0512    1.9386    0.2423 H   0  0  0  0  0  0  0  0  0  0  0  0
    0.9248    0.9959   -2.1377 C   0  0  0  0  0  0  0  0  0  0  0  0
    2.9899    2.7706    2.5345 C   0  0  0  0  0  0  0  0  0  0  0  0
    2.3250    1.8195    1.8658 N   0  0  0  0  0  0  0  0  0  0  0  0
    2.4891    3.5241    3.3422 O   0  0  0  0  0  0  0  0  0  0  0  0
    5.3173   -0.7868    0.9729 C   0  0  0  0  0  0  0  0  0  0  0  0
  1  2  1  0      
  4  1  1  0      
  5  6  1  0      
  6  7  1  0      
  7  3  1  0      
  6  8  1  0      
  8  9  1  0      
  9 10  2  0      
 10 11  1  0      
 11  7  1  0      
  5 12  1  0      
 12 13  1  0      
 13 15  1  0      
 15 16  1  0      
 16 17  1  0      
 17 18  1  0      
 18 19  1  0      
 19 20  1  0      
 20 14  2  0      
 12 21  2  0      
 17 22  2  0      
 16 23  1  0      
  8 14  1  0      
  8 24  1  0      
 20 25  1  0      
 10 26  1  0      
  7 27  1  0      
  3  4  1  0      
  1 28  1  0      
  6 29  1  0      
 29 30  1  0      
 30  3  1  0      
 29 31  2  0      
 11 32  1  0      
M  END
$$$$
