# Supplementary material for: Bioactive Phenylalanine Derivatives and Cytochalasins from the Soft Coral-Derived Fungus, Aspergillus elegans
Source: MDPI journal article supplement (doi:10.3390/md11062054), 2013-06-10
Supplement: s5 [file s5]

marinedrugs-11-02054-s002.mol
  ChemDraw02071408392D

 32 34  0  0  0  0  0  0  0  0999 V2000
   -3.1393   -0.1790    0.0000 C   0  0  0  0  0  0  0  0  0  0  0  0
   -3.1393   -1.0040    0.0000 C   0  0  0  0  0  0  0  0  0  0  0  0
   -1.7103   -0.1790    0.0000 C   0  0  0  0  0  0  0  0  0  0  0  0
   -2.4248    0.2335    0.0000 C   0  0  0  0  0  0  0  0  0  0  0  0
   -0.2814   -1.0040    0.0000 O   0  0  0  0  0  0  0  0  0  0  0  0
   -0.2814   -0.1790    0.0000 C   0  0  0  0  0  0  0  0  0  0  0  0
   -0.9959    0.2335    0.0000 C   0  0  0  0  0  0  0  0  0  0  0  0
    0.4331    0.2335    0.0000 C   0  0  0  0  0  0  0  0  0  0  0  0
    0.4331    1.0585    0.0000 C   0  0  0  0  0  0  0  0  0  0  0  0
   -0.2814    1.4710    0.0000 C   0  0  0  0  0  0  0  0  0  0  0  0
   -0.9959    1.0585    0.0000 C   0  0  0  0  0  0  0  0  0  0  0  0
    0.4331   -1.4165    0.0000 C   0  0  0  0  0  0  0  0  0  0  0  0
    1.1475   -1.0040    0.0000 C   0  0  0  0  0  0  0  0  0  0  0  0
    1.1475   -0.1790    0.0000 C   0  0  0  0  0  0  0  0  0  0  0  0
    1.7309   -1.5874    0.0000 C   0  0  0  0  0  0  0  0  0  0  0  0
    2.6077   -1.5815    0.0000 C   0  0  0  0  0  0  0  0  0  0  0  0
    3.1233   -1.0659    0.0000 C   0  0  0  0  0  0  0  0  0  0  0  0
    3.1233   -0.1790    0.0000 C   0  0  0  0  0  0  0  0  0  0  0  0
    2.5559    0.4043    0.0000 C   0  0  0  0  0  0  0  0  0  0  0  0
    1.7309    0.4043    0.0000 C   0  0  0  0  0  0  0  0  0  0  0  0
    0.4331   -2.2415    0.0000 O   0  0  0  0  0  0  0  0  0  0  0  0
    3.8537   -1.4165    0.0000 O   0  0  0  0  0  0  0  0  0  0  0  0
    3.0202   -2.2960    0.0000 O   0  0  0  0  0  0  0  0  0  0  0  0
    1.1475    0.6460    0.0000 H   0  0  0  0  0  0  0  0  0  0  0  0
    1.5174    1.2012    0.0000 C   0  0  0  0  0  0  0  0  0  0  0  0
   -0.2814    2.2960    0.0000 C   0  0  0  0  0  0  0  0  0  0  0  0
   -1.7103    0.6460    0.0000 H   0  0  0  0  0  0  0  0  0  0  0  0
   -3.8537    0.2335    0.0000 C   0  0  0  0  0  0  0  0  0  0  0  0
   -0.8648   -0.7624    0.0000 C   0  0  0  0  0  0  0  0  0  0  0  0
   -1.7029   -0.7565    0.0000 N   0  0  0  0  0  0  0  0  0  0  0  0
   -0.6512   -1.5593    0.0000 O   0  0  0  0  0  0  0  0  0  0  0  0
   -1.7103    1.4710    0.0000 C   0  0  0  0  0  0  0  0  0  0  0  0
  1  2  1  0      
  4  1  1  0      
  5  6  1  0      
  6  7  1  0      
  7  3  1  0      
  6  8  1  0      
  8  9  1  0      
  9 10  2  0      
 10 11  1  0      
 11  7  1  0      
  5 12  1  0      
 12 13  1  0      
 13 15  1  0      
 15 16  1  0      
 16 17  1  0      
 17 18  1  0      
 18 19  1  0      
 19 20  1  0      
 20 14  2  0      
 12 21  2  0      
 17 22  2  0      
 16 23  1  6      
  8 14  1  6      
  8 24  1  1      
 20 25  1  0      
 10 26  1  0      
  7 27  1  1      
  3  4  1  1      
  1 28  1  0      
  6 29  1  6      
 29 30  1  0      
 30  3  1  0      
 29 31  2  0      
 11 32  1  6      
M  END
