# Supplementary material for: Bioactive Phenylalanine Derivatives and Cytochalasins from the Soft Coral-Derived Fungus, Aspergillus elegans
Source: MDPI journal article supplement (doi:10.3390/md11062054), 2013-06-10
Supplement: s6 [file s6]

marinedrugs-11-02054-s003.mol
  ChemDraw02071408402D

 36 40  0  0  0  0  0  0  0  0999 V2000
   -2.8153   -0.1378    0.0000 C   0  0  0  0  0  0  0  0  0  0  0  0
   -2.8153   -0.9628    0.0000 C   0  0  0  0  0  0  0  0  0  0  0  0
   -1.3863   -0.1378    0.0000 C   0  0  0  0  0  0  0  0  0  0  0  0
   -2.1008    0.2747    0.0000 C   0  0  0  0  0  0  0  0  0  0  0  0
    0.0426   -0.9628    0.0000 O   0  0  0  0  0  0  0  0  0  0  0  0
    0.0426   -0.1378    0.0000 C   0  0  0  0  0  0  0  0  0  0  0  0
   -0.6719    0.2747    0.0000 C   0  0  0  0  0  0  0  0  0  0  0  0
    0.7571    0.2747    0.0000 C   0  0  0  0  0  0  0  0  0  0  0  0
    0.7571    1.0997    0.0000 C   0  0  0  0  0  0  0  0  0  0  0  0
    0.0426    1.5122    0.0000 C   0  0  0  0  0  0  0  0  0  0  0  0
   -0.6719    1.0997    0.0000 C   0  0  0  0  0  0  0  0  0  0  0  0
    0.7571   -1.3753    0.0000 C   0  0  0  0  0  0  0  0  0  0  0  0
    1.4716   -0.9628    0.0000 C   0  0  0  0  0  0  0  0  0  0  0  0
    1.4716   -0.1378    0.0000 C   0  0  0  0  0  0  0  0  0  0  0  0
    2.0549   -1.5462    0.0000 C   0  0  0  0  0  0  0  0  0  0  0  0
    2.9317   -1.5403    0.0000 C   0  0  0  0  0  0  0  0  0  0  0  0
    3.4473   -1.0247    0.0000 C   0  0  0  0  0  0  0  0  0  0  0  0
    3.4473   -0.1378    0.0000 C   0  0  0  0  0  0  0  0  0  0  0  0
    2.8799    0.4456    0.0000 C   0  0  0  0  0  0  0  0  0  0  0  0
    2.0549    0.4456    0.0000 C   0  0  0  0  0  0  0  0  0  0  0  0
    0.7571   -2.2003    0.0000 O   0  0  0  0  0  0  0  0  0  0  0  0
    2.7182   -2.3372    0.0000 O   0  0  0  0  0  0  0  0  0  0  0  0
    1.4716    0.6872    0.0000 H   0  0  0  0  0  0  0  0  0  0  0  0
   -1.3863    0.6872    0.0000 H   0  0  0  0  0  0  0  0  0  0  0  0
   -3.5297    0.2747    0.0000 C   0  0  0  0  0  0  0  0  0  0  0  0
   -0.5408   -0.7212    0.0000 C   0  0  0  0  0  0  0  0  0  0  0  0
   -1.0489   -0.8597    0.0000 N   0  0  0  0  0  0  0  0  0  0  0  0
   -0.3272   -1.5181    0.0000 O   0  0  0  0  0  0  0  0  0  0  0  0
   -1.3863    1.5122    0.0000 C   0  0  0  0  0  0  0  0  0  0  0  0
    3.7286   -1.7538    0.0000 C   0  0  0  0  0  0  0  0  0  0  0  0
    4.2442    0.0757    0.0000 C   0  0  0  0  0  0  0  0  0  0  0  0
    0.0426    2.3372    0.0000 C   0  0  0  0  0  0  0  0  0  0  0  0
    0.8279    1.9041    0.0000 O   0  0  0  0  0  0  0  0  0  0  0  0
   -4.2442   -0.1378    0.0000 C   0  0  0  0  0  0  0  0  0  0  0  0
   -4.2442   -0.9628    0.0000 C   0  0  0  0  0  0  0  0  0  0  0  0
   -3.5297   -1.3753    0.0000 C   0  0  0  0  0  0  0  0  0  0  0  0
  1  2  1  0      
  4  1  1  0      
  5  6  1  0      
  6  7  1  0      
  7  3  1  0      
  6  8  1  0      
  8  9  1  0      
  9 10  1  0      
 10 11  1  0      
 11  7  1  0      
  5 12  1  0      
 12 13  1  0      
 13 15  2  0      
 15 16  1  0      
 16 17  1  0      
 17 18  1  0      
 18 19  1  0      
 19 20  1  0      
 20 14  2  0      
 12 21  2  0      
 16 22  1  6      
  8 14  1  6      
  8 23  1  1      
  7 24  1  1      
  3  4  1  1      
  1 25  2  0      
  6 26  1  6      
 26 27  1  0      
 27  3  1  0      
 26 28  2  0      
 11 29  1  6      
 16 30  1  1      
 18 31  1  6      
 10 32  1  6      
 10 33  1  1      
 33  9  1  1      
 25 34  1  0      
 34 35  2  0      
 35 36  1  0      
 36  2  2  0      
M  END
