# Supplementary material for: Bioactive Phenylalanine Derivatives and Cytochalasins from the Soft Coral-Derived Fungus, Aspergillus elegans
Source: MDPI journal article supplement (doi:10.3390/md11062054), 2013-06-10
Supplement: s8 [file s8]

marinedrugs-11-02054-s004.mol
  corina  04141423203D 1   1.00000     0.00000 
CORINA 3.49 0023  12.04.2013
 32 34  0  0  0  0  0  0  0  0999 V2000
   -0.4329    2.1692    1.2362 C   0  0  0  0  0  0  0  0  0  0  0  0
   -1.1094    2.8593    2.4225 C   0  0  0  0  0  0  0  0  0  0  0  0
    1.1596    4.0669    0.9120 C   0  0  0  0  0  0  0  0  0  0  0  0
    1.0438    2.5667    1.1893 C   0  0  0  0  0  0  0  0  0  0  0  0
    3.8555    3.7247   -1.0160 O   0  0  0  0  0  0  0  0  0  0  0  0
    2.9972    4.7565   -0.4982 C   0  0  0  0  0  0  0  0  0  0  0  0
    2.6345    4.5006    0.9712 C   0  0  0  0  0  0  0  0  0  0  0  0
    3.6765    6.1186   -0.6301 C   0  0  0  0  0  0  0  0  0  0  0  0
    2.7354    7.1935   -0.1367 C   0  0  0  0  0  0  0  0  0  0  0  0
    2.2778    6.9848    1.0932 C   0  0  0  0  0  0  0  0  0  0  0  0
    2.7703    5.7575    1.8168 C   0  0  0  0  0  0  0  0  0  0  0  0
    3.4335    2.9130   -1.9761 C   0  0  0  0  0  0  0  0  0  0  0  0
    3.9999    2.8566   -3.3191 C   0  0  0  0  0  0  0  0  0  0  0  0
    4.1936    6.3483   -2.0066 C   0  0  0  0  0  0  0  0  0  0  0  0
    4.9930    3.6795   -3.6534 C   0  0  0  0  0  0  0  0  0  0  0  0
    5.5580    3.6691   -5.0498 C   0  0  0  0  0  0  0  0  0  0  0  0
    5.3604    5.0542   -5.6751 C   0  0  0  0  0  0  0  0  0  0  0  0
    4.0353    5.6458   -5.1902 C   0  0  0  0  0  0  0  0  0  0  0  0
    4.3009    6.9018   -4.3569 C   0  0  0  0  0  0  0  0  0  0  0  0
    3.5461    6.7897   -3.0440 C   0  0  0  0  0  0  0  0  0  0  0  0
    2.5113    2.1642   -1.7192 O   0  0  0  0  0  0  0  0  0  0  0  0
    4.8767    2.6881   -5.8345 O   0  0  0  0  0  0  0  0  0  0  0  0
    4.5446    6.1099    0.0610 H   0  0  0  0  0  0  0  0  0  0  0  0
    3.2499    3.6984    1.3746 H   0  0  0  0  0  0  0  0  0  0  0  0
   -0.5479    0.6519    1.3956 C   0  0  0  0  0  0  0  0  0  0  0  0
    1.6842    4.7527   -1.2468 C   0  0  0  0  0  0  0  0  0  0  0  0
    0.6873    4.3637   -0.4409 N   0  0  0  0  0  0  0  0  0  0  0  0
    1.5516    5.0594   -2.4127 O   0  0  0  0  0  0  0  0  0  0  0  0
    1.9609    5.5808    3.1031 C   0  0  0  0  0  0  0  0  0  0  0  0
    6.4358    5.9109   -5.2855 O   0  0  0  0  0  0  0  0  0  0  0  0
    2.1010    7.2038   -3.0155 C   0  0  0  0  0  0  0  0  0  0  0  0
    1.3054    7.9376    1.7394 C   0  0  0  0  0  0  0  0  0  0  0  0
  1  2  1  0      
  4  1  1  0      
  5  6  1  0      
  6  7  1  0      
  7  3  1  0      
  6  8  1  0      
  8  9  1  0      
  9 10  2  0      
 10 11  1  0      
 11  7  1  0      
  5 12  1  0      
 12 13  1  0      
 13 15  2  0      
 15 16  1  0      
 16 17  1  0      
 17 18  1  0      
 18 19  1  0      
 19 20  1  0      
 20 14  2  0      
 12 21  2  0      
 16 22  1  0      
  8 14  1  0      
  8 23  1  0      
  7 24  1  0      
  3  4  1  0      
  1 25  1  0      
  6 26  1  0      
 26 27  1  0      
 27  3  1  0      
 26 28  2  0      
 11 29  1  0      
 17 30  1  0      
 20 31  1  0      
 10 32  1  0      
M  END
$$$$
