# Supplementary material for: Bioactive Phenylalanine Derivatives and Cytochalasins from the Soft Coral-Derived Fungus, Aspergillus elegans
Source: MDPI journal article supplement (doi:10.3390/md11062054), 2013-06-10
Supplement: s10 [file s10]

marinedrugs-11-02054-s005.mol
  corina  04141423203D 1   1.00000     0.00000 
CORINA 3.49 0023  12.04.2013
 31 33  0  0  0  0  0  0  0  0999 V2000
    0.1091    1.9016   -0.3578 C   0  0  0  0  0  0  0  0  0  0  0  0
    0.0856    0.3734   -0.4302 C   0  0  0  0  0  0  0  0  0  0  0  0
    2.1898    1.9094    1.0253 C   0  0  0  0  0  0  0  0  0  0  0  0
    1.5584    2.3864   -0.2842 C   0  0  0  0  0  0  0  0  0  0  0  0
    3.7975    3.2579    2.2294 C   0  0  0  0  0  0  0  0  0  0  0  0
    3.6809    2.2830    1.0547 C   0  0  0  0  0  0  0  0  0  0  0  0
    4.8027    2.7596    3.2653 C   0  0  0  0  0  0  0  0  0  0  0  0
    4.4411    1.3506    3.6734 C   0  0  0  0  0  0  0  0  0  0  0  0
    4.2968    0.4891    2.6765 C   0  0  0  0  0  0  0  0  0  0  0  0
    4.5173    1.0291    1.2823 C   0  0  0  0  0  0  0  0  0  0  0  0
    4.2155    4.6278    1.7552 C   0  0  0  0  0  0  0  0  0  0  0  0
    4.5264    5.6604    2.7572 C   0  0  0  0  0  0  0  0  0  0  0  0
    4.7810    3.6727    4.4585 C   0  0  0  0  0  0  0  0  0  0  0  0
    4.9785    6.8731    2.3800 C   0  0  0  0  0  0  0  0  0  0  0  0
    5.2867    7.8823    3.4064 C   0  0  0  0  0  0  0  0  0  0  0  0
    5.0411    7.5646    4.8608 C   0  0  0  0  0  0  0  0  0  0  0  0
    6.2379    6.7949    5.4221 C   0  0  0  0  0  0  0  0  0  0  0  0
    5.7993    5.3989    5.8614 C   0  0  0  0  0  0  0  0  0  0  0  0
    5.8094    4.4595    4.6848 C   0  0  0  0  0  0  0  0  0  0  0  0
    4.2944    4.8735    0.5707 O   0  0  0  0  0  0  0  0  0  0  0  0
    5.7347    8.9620    3.0851 O   0  0  0  0  0  0  0  0  0  0  0  0
    5.8014    2.7694    2.8236 H   0  0  0  0  0  0  0  0  0  0  0  0
    3.9685    2.7673    0.1239 H   0  0  0  0  0  0  0  0  0  0  0  0
   -0.5599    2.4816   -1.6056 C   0  0  0  0  0  0  0  0  0  0  0  0
    2.4227    3.3355    2.8436 C   0  0  0  0  0  0  0  0  0  0  0  0
    1.5550    2.5801    2.1576 N   0  0  0  0  0  0  0  0  0  0  0  0
    2.1413    3.9911    3.8243 O   0  0  0  0  0  0  0  0  0  0  0  0
    4.1178   -0.0364    0.2595 C   0  0  0  0  0  0  0  0  0  0  0  0
    4.8709    8.7805    5.5920 O   0  0  0  0  0  0  0  0  0  0  0  0
    6.9998    4.4032    3.7632 C   0  0  0  0  0  0  0  0  0  0  0  0
    3.9325   -0.9527    2.9204 C   0  0  0  0  0  0  0  0  0  0  0  0
  1  2  1  0      
  4  1  1  0      
  5  6  1  0      
  6  3  1  0      
  5  7  1  0      
  7  8  1  0      
  8  9  2  0      
  9 10  1  0      
 10  6  1  0      
 11 12  1  0      
 12 14  2  0      
 14 15  1  0      
 15 16  1  0      
 16 17  1  0      
 17 18  1  0      
 18 19  1  0      
 19 13  2  0      
 11 20  2  0      
  7 13  1  0      
  7 22  1  0      
  6 23  1  0      
  3  4  1  0      
  1 24  1  0      
  5 25  1  0      
 25 26  1  0      
 26  3  1  0      
 25 27  2  0      
 10 28  1  0      
 19 30  1  0      
  9 31  1  0      
 16 29  1  0      
 15 21  2  0      
  5 11  1  0      
M  END
$$$$
