# Supplementary material for: Bioactive Phenylalanine Derivatives and Cytochalasins from the Soft Coral-Derived Fungus, Aspergillus elegans
Source: MDPI journal article supplement (doi:10.3390/md11062054), 2013-06-10
Supplement: s12 [file s12]

marinedrugs-11-02054-s006.mol
  corina  04141423203D 1   1.00000     0.00000 
CORINA 3.49 0023  12.04.2013
 32 35  0  0  0  0  0  0  0  0999 V2000
   -0.3798    1.0202    1.6046 C   0  0  0  0  0  0  0  0  0  0  0  0
   -0.3352   -0.4958    1.8069 C   0  0  0  0  0  0  0  0  0  0  0  0
    1.8976    1.3243    2.5860 C   0  0  0  0  0  0  0  0  0  0  0  0
    1.0344    1.5414    1.3416 C   0  0  0  0  0  0  0  0  0  0  0  0
    3.6278    2.8781    3.2683 C   0  0  0  0  0  0  0  0  0  0  0  0
    3.3519    1.7290    2.2929 C   0  0  0  0  0  0  0  0  0  0  0  0
    4.7968    2.5573    4.1953 C   0  0  0  0  0  0  0  0  0  0  0  0
    4.5617    1.2102    4.8438 C   0  0  0  0  0  0  0  0  0  0  0  0
    4.2992    0.2109    4.0159 C   0  0  0  0  0  0  0  0  0  0  0  0
    4.2770    0.5444    2.5414 C   0  0  0  0  0  0  0  0  0  0  0  0
    3.9099    4.1392    2.4952 C   0  0  0  0  0  0  0  0  0  0  0  0
    5.2128    4.8759    2.6429 C   0  0  0  0  0  0  0  0  0  0  0  0
    4.8988    3.6209    5.2531 C   0  0  0  0  0  0  0  0  0  0  0  0
    5.1666    6.3140    3.1584 C   0  0  0  0  0  0  0  0  0  0  0  0
    6.3236    6.7957    4.0367 C   0  0  0  0  0  0  0  0  0  0  0  0
    5.8428    6.9337    5.4822 C   0  0  0  0  0  0  0  0  0  0  0  0
    6.7732    6.1457    6.4069 C   0  0  0  0  0  0  0  0  0  0  0  0
    6.0300    4.9296    6.9612 C   0  0  0  0  0  0  0  0  0  0  0  0
    6.0028    3.8372    5.9188 C   0  0  0  0  0  0  0  0  0  0  0  0
    3.0714    4.5684    1.7395 O   0  0  0  0  0  0  0  0  0  0  0  0
    7.3922    5.8488    3.9784 O   0  0  0  0  0  0  0  0  0  0  0  0
    5.7089    2.5175    3.6014 H   0  0  0  0  0  0  0  0  0  0  0  0
    3.4506    2.0756    1.2632 H   0  0  0  0  0  0  0  0  0  0  0  0
   -1.2752    1.3489    0.4084 C   0  0  0  0  0  0  0  0  0  0  0  0
    2.3633    3.0484    4.0738 C   0  0  0  0  0  0  0  0  0  0  0  0
    1.4264    2.1786    3.6753 N   0  0  0  0  0  0  0  0  0  0  0  0
    2.2157    3.8620    4.9611 O   0  0  0  0  0  0  0  0  0  0  0  0
    3.7744   -0.6672    1.7538 C   0  0  0  0  0  0  0  0  0  0  0  0
    5.8533    8.3123    5.8581 O   0  0  0  0  0  0  0  0  0  0  0  0
    7.2458    3.0246    5.6693 C   0  0  0  0  0  0  0  0  0  0  0  0
    4.0369   -1.1859    4.5170 C   0  0  0  0  0  0  0  0  0  0  0  0
    5.4469    6.0025    1.7933 O   0  0  0  0  0  0  0  0  0  0  0  0
  1  2  1  0      
  4  1  1  0      
  5  6  1  0      
  6  3  1  0      
  5  7  1  0      
  7  8  1  0      
  8  9  2  0      
  9 10  1  0      
 10  6  1  0      
 11 12  1  0      
 12 14  1  0      
 14 15  1  0      
 15 16  1  0      
 16 17  1  0      
 17 18  1  0      
 18 19  1  0      
 19 13  2  0      
 11 20  2  0      
  7 13  1  0      
  7 22  1  0      
  6 23  1  0      
  3  4  1  0      
  1 24  1  0      
  5 25  1  0      
 25 26  1  0      
 26  3  1  0      
 25 27  2  0      
 10 28  1  0      
 19 30  1  0      
  9 31  1  0      
 16 29  1  0      
  5 11  1  0      
 15 21  1  0      
 12 32  1  0      
 14 32  1  0      
M  END
$$$$
