# Supplementary material for: Bioactive Phenylalanine Derivatives and Cytochalasins from the Soft Coral-Derived Fungus, Aspergillus elegans
Source: MDPI journal article supplement (doi:10.3390/md11062054), 2013-06-10
Supplement: s13 [file s13]

marinedrugs-11-02054-s006.mol
  ChemDraw02071408402D

 32 35  0  0  0  0  0  0  0  0999 V2000
   -3.1725   -0.1790    0.0000 C   0  0  0  0  0  0  0  0  0  0  0  0
   -3.1725   -1.0040    0.0000 C   0  0  0  0  0  0  0  0  0  0  0  0
   -1.7436   -0.1790    0.0000 C   0  0  0  0  0  0  0  0  0  0  0  0
   -2.4580    0.2335    0.0000 C   0  0  0  0  0  0  0  0  0  0  0  0
   -0.3146   -0.1790    0.0000 C   0  0  0  0  0  0  0  0  0  0  0  0
   -1.0291    0.2335    0.0000 C   0  0  0  0  0  0  0  0  0  0  0  0
    0.3998    0.2335    0.0000 C   0  0  0  0  0  0  0  0  0  0  0  0
    0.3998    1.0585    0.0000 C   0  0  0  0  0  0  0  0  0  0  0  0
   -0.3146    1.4710    0.0000 C   0  0  0  0  0  0  0  0  0  0  0  0
   -1.0291    1.0585    0.0000 C   0  0  0  0  0  0  0  0  0  0  0  0
    0.2645   -1.1278    0.0000 C   0  0  0  0  0  0  0  0  0  0  0  0
    1.1143   -1.0040    0.0000 C   0  0  0  0  0  0  0  0  0  0  0  0
    1.1143   -0.1790    0.0000 C   0  0  0  0  0  0  0  0  0  0  0  0
    1.6977   -1.5874    0.0000 C   0  0  0  0  0  0  0  0  0  0  0  0
    2.5745   -1.5815    0.0000 C   0  0  0  0  0  0  0  0  0  0  0  0
    3.0901   -1.0659    0.0000 C   0  0  0  0  0  0  0  0  0  0  0  0
    3.0901   -0.1790    0.0000 C   0  0  0  0  0  0  0  0  0  0  0  0
    2.5227    0.4043    0.0000 C   0  0  0  0  0  0  0  0  0  0  0  0
    1.6977    0.4043    0.0000 C   0  0  0  0  0  0  0  0  0  0  0  0
    0.2645   -1.9528    0.0000 O   0  0  0  0  0  0  0  0  0  0  0  0
    2.9870   -2.2960    0.0000 O   0  0  0  0  0  0  0  0  0  0  0  0
    1.1143    0.6460    0.0000 H   0  0  0  0  0  0  0  0  0  0  0  0
   -1.7436    0.6460    0.0000 H   0  0  0  0  0  0  0  0  0  0  0  0
   -3.8870    0.2335    0.0000 C   0  0  0  0  0  0  0  0  0  0  0  0
   -0.8980   -0.7624    0.0000 C   0  0  0  0  0  0  0  0  0  0  0  0
   -1.4062   -0.9009    0.0000 N   0  0  0  0  0  0  0  0  0  0  0  0
   -0.8980   -1.5874    0.0000 O   0  0  0  0  0  0  0  0  0  0  0  0
   -1.7436    1.4710    0.0000 C   0  0  0  0  0  0  0  0  0  0  0  0
    3.8870   -1.2794    0.0000 O   0  0  0  0  0  0  0  0  0  0  0  0
    1.2852    1.1188    0.0000 C   0  0  0  0  0  0  0  0  0  0  0  0
   -0.3146    2.2960    0.0000 C   0  0  0  0  0  0  0  0  0  0  0  0
    1.0276   -1.6846    0.0000 O   0  0  0  0  0  0  0  0  0  0  0  0
  1  2  1  0      
  4  1  1  0      
  5  6  1  0      
  6  3  1  0      
  5  7  1  0      
  7  8  1  0      
  8  9  2  0      
  9 10  1  0      
 10  6  1  0      
 11 12  1  0      
 12 14  1  0      
 14 15  1  0      
 15 16  1  0      
 16 17  1  0      
 17 18  1  0      
 18 19  1  0      
 19 13  2  0      
 11 20  2  0      
  7 13  1  6      
  7 22  1  1      
  6 23  1  1      
  3  4  1  1      
  1 24  1  0      
  5 25  1  6      
 25 26  1  0      
 26  3  1  0      
 25 27  2  0      
 10 28  1  6      
 19 30  1  0      
  9 31  1  0      
 16 29  1  1      
  5 11  1  0      
 15 21  1  1      
 12 32  1  1      
 14 32  1  1      
M  END
