# Supplementary material for: Bioactive Phenylalanine Derivatives and Cytochalasins from the Soft Coral-Derived Fungus, Aspergillus elegans
Source: MDPI journal article supplement (doi:10.3390/md11062054), 2013-06-10
Supplement: s14 [file s14]

marinedrugs-11-02054-s007.mol
  corina  04141423213D 1   1.00000     0.00000 
CORINA 3.49 0023  12.04.2013
 34 38  0  0  0  0  0  0  0  0999 V2000
   -0.3561    1.4326    0.0765 C   0  0  0  0  0  0  0  0  0  0  0  0
   -0.2823   -0.0856    0.2509 C   0  0  0  0  0  0  0  0  0  0  0  0
    1.7181    1.7940    1.4217 C   0  0  0  0  0  0  0  0  0  0  0  0
    1.0594    2.0133    0.0583 C   0  0  0  0  0  0  0  0  0  0  0  0
    3.2801    3.5370    1.3739 C   0  0  0  0  0  0  0  0  0  0  0  0
    3.2693    1.9957    1.3266 C   0  0  0  0  0  0  0  0  0  0  0  0
    4.6294    4.0955    1.7094 C   0  0  0  0  0  0  0  0  0  0  0  0
    5.3139    3.3997    2.8260 C   0  0  0  0  0  0  0  0  0  0  0  0
    4.9540    2.2116    3.2104 C   0  0  0  0  0  0  0  0  0  0  0  0
    3.8182    1.4340    2.6423 C   0  0  0  0  0  0  0  0  0  0  0  0
    2.8603    4.1101    0.0338 C   0  0  0  0  0  0  0  0  0  0  0  0
    4.1641    6.2180    0.4241 C   0  0  0  0  0  0  0  0  0  0  0  0
    4.6591    5.6006    1.7586 C   0  0  0  0  0  0  0  0  0  0  0  0
    5.3261    5.9614   -0.5205 C   0  0  0  0  0  0  0  0  0  0  0  0
    5.7928    7.1583   -1.3960 C   0  0  0  0  0  0  0  0  0  0  0  0
    5.7881    8.3787   -0.5290 C   0  0  0  0  0  0  0  0  0  0  0  0
    6.7005    8.2931    0.6787 C   0  0  0  0  0  0  0  0  0  0  0  0
    5.9529    7.5944    1.7693 C   0  0  0  0  0  0  0  0  0  0  0  0
    6.1806    6.0500    1.6929 C   0  0  0  0  0  0  0  0  0  0  0  0
    2.5319    3.4014   -0.8872 O   0  0  0  0  0  0  0  0  0  0  0  0
    7.1133    6.9158   -1.8854 O   0  0  0  0  0  0  0  0  0  0  0  0
    5.2365    3.8568    0.8362 H   0  0  0  0  0  0  0  0  0  0  0  0
    3.7269    1.5728    0.4323 H   0  0  0  0  0  0  0  0  0  0  0  0
   -1.0590    1.7609   -1.2423 C   0  0  0  0  0  0  0  0  0  0  0  0
    2.2030    3.8566    2.3831 C   0  0  0  0  0  0  0  0  0  0  0  0
    1.3050    2.8427    2.3761 N   0  0  0  0  0  0  0  0  0  0  0  0
    2.1514    4.8484    3.0791 O   0  0  0  0  0  0  0  0  0  0  0  0
    2.6851    1.4063    3.6700 C   0  0  0  0  0  0  0  0  0  0  0  0
    5.7494    1.5698    4.3179 C   0  0  0  0  0  0  0  0  0  0  0  0
    2.8749    5.6151   -0.0854 C   0  0  0  0  0  0  0  0  0  0  0  0
    4.1407    5.9964    2.6319 H   0  0  0  0  0  0  0  0  0  0  0  0
    7.1144    5.4662    2.7549 C   0  0  0  0  0  0  0  0  0  0  0  0
    6.4491    5.6624    0.3200 O   0  0  0  0  0  0  0  0  0  0  0  0
    4.0264    7.2921    0.5486 H   0  0  0  0  0  0  0  0  0  0  0  0
  1  2  1  0      
  4  1  1  0      
  5  6  1  0      
  6  3  1  0      
  5  7  1  0      
  7  8  1  0      
  8  9  2  0      
  9 10  1  0      
 10  6  1  0      
 12 14  1  0      
 14 15  1  0      
 15 16  1  0      
 16 17  1  0      
 17 18  1  0      
 18 19  1  0      
 19 13  1  0      
 11 20  2  0      
  7 22  1  0      
  6 23  1  0      
  3  4  1  0      
  1 24  1  0      
  5 25  1  0      
 25 26  1  0      
 26  3  1  0      
 25 27  2  0      
 10 28  1  0      
  9 29  1  0      
  5 11  1  0      
 15 21  1  0      
  7 13  1  0      
 13 12  1  0      
 11 30  1  0      
 12 30  1  0      
 13 31  1  0      
 19 32  1  0      
 19 33  1  0      
 14 33  1  0      
 12 34  1  0      
M  END
$$$$
