# Supplementary material for: Bioactive Phenylalanine Derivatives and Cytochalasins from the Soft Coral-Derived Fungus, Aspergillus elegans
Source: MDPI journal article supplement (doi:10.3390/md11062054), 2013-06-10
Supplement: s15 [file s15]

marinedrugs-11-02054-s007.mol
  ChemDraw02071408402D

 34 38  0  0  0  0  0  0  0  0999 V2000
   -2.7741   -0.1790    0.0000 C   0  0  0  0  0  0  0  0  0  0  0  0
   -2.7741   -1.0040    0.0000 C   0  0  0  0  0  0  0  0  0  0  0  0
   -1.3451   -0.1790    0.0000 C   0  0  0  0  0  0  0  0  0  0  0  0
   -2.0596    0.2335    0.0000 C   0  0  0  0  0  0  0  0  0  0  0  0
    0.0838   -0.1790    0.0000 C   0  0  0  0  0  0  0  0  0  0  0  0
   -0.6306    0.2335    0.0000 C   0  0  0  0  0  0  0  0  0  0  0  0
    0.7983    0.2335    0.0000 C   0  0  0  0  0  0  0  0  0  0  0  0
    0.7983    1.0585    0.0000 C   0  0  0  0  0  0  0  0  0  0  0  0
    0.0838    1.4710    0.0000 C   0  0  0  0  0  0  0  0  0  0  0  0
   -0.6306    1.0585    0.0000 C   0  0  0  0  0  0  0  0  0  0  0  0
    0.4360   -0.8596    0.0000 C   0  0  0  0  0  0  0  0  0  0  0  0
    1.5128   -1.0040    0.0000 C   0  0  0  0  0  0  0  0  0  0  0  0
    1.5128   -0.1790    0.0000 C   0  0  0  0  0  0  0  0  0  0  0  0
    2.0961   -1.5874    0.0000 C   0  0  0  0  0  0  0  0  0  0  0  0
    2.9729   -1.5815    0.0000 C   0  0  0  0  0  0  0  0  0  0  0  0
    3.4885   -1.0659    0.0000 C   0  0  0  0  0  0  0  0  0  0  0  0
    3.4885   -0.1790    0.0000 C   0  0  0  0  0  0  0  0  0  0  0  0
    2.9211    0.4043    0.0000 C   0  0  0  0  0  0  0  0  0  0  0  0
    2.0961    0.4043    0.0000 C   0  0  0  0  0  0  0  0  0  0  0  0
    0.4360   -1.6846    0.0000 O   0  0  0  0  0  0  0  0  0  0  0  0
    3.3854   -2.2960    0.0000 O   0  0  0  0  0  0  0  0  0  0  0  0
    1.5128    0.6460    0.0000 H   0  0  0  0  0  0  0  0  0  0  0  0
   -1.3451    0.6460    0.0000 H   0  0  0  0  0  0  0  0  0  0  0  0
   -3.4885    0.2335    0.0000 C   0  0  0  0  0  0  0  0  0  0  0  0
   -0.4995   -0.7624    0.0000 C   0  0  0  0  0  0  0  0  0  0  0  0
   -1.0077   -0.9009    0.0000 N   0  0  0  0  0  0  0  0  0  0  0  0
   -0.4995   -1.5874    0.0000 O   0  0  0  0  0  0  0  0  0  0  0  0
   -1.3451    1.4710    0.0000 C   0  0  0  0  0  0  0  0  0  0  0  0
    0.0838    2.2960    0.0000 C   0  0  0  0  0  0  0  0  0  0  0  0
    0.9310   -1.2103    0.0000 C   0  0  0  0  0  0  0  0  0  0  0  0
    0.7983   -0.5915    0.0000 H   0  0  0  0  0  0  0  0  0  0  0  0
    1.6836    1.1188    0.0000 C   0  0  0  0  0  0  0  0  0  0  0  0
    2.5810   -0.5915    0.0000 O   0  0  0  0  0  0  0  0  0  0  0  0
    1.5128   -1.8290    0.0000 H   0  0  0  0  0  0  0  0  0  0  0  0
  1  2  1  0      
  4  1  1  0      
  5  6  1  0      
  6  3  1  0      
  5  7  1  0      
  7  8  1  0      
  8  9  2  0      
  9 10  1  0      
 10  6  1  0      
 12 14  1  0      
 14 15  1  0      
 15 16  1  0      
 16 17  1  0      
 17 18  1  0      
 18 19  1  0      
 19 13  1  0      
 11 20  2  0      
  7 22  1  1      
  6 23  1  1      
  3  4  1  1      
  1 24  1  0      
  5 25  1  6      
 25 26  1  0      
 26  3  1  0      
 25 27  2  0      
 10 28  1  6      
  9 29  1  0      
  5 11  1  0      
 15 21  1  1      
  7 13  1  0      
 13 12  1  0      
 11 30  1  0      
 12 30  1  0      
 13 31  1  6      
 19 32  1  6      
 19 33  1  1      
 14 33  1  1      
 12 34  1  6      
M  END
