# Supplementary material for: Bioactive Phenylalanine Derivatives and Cytochalasins from the Soft Coral-Derived Fungus, Aspergillus elegans
Source: MDPI journal article supplement (doi:10.3390/md11062054), 2013-06-10
Supplement: s16 [file s16]

marinedrugs-11-02054-s008.mol
  corina  04141423213D 1   1.00000     0.00000 
CORINA 3.49 0023  12.04.2013
 36 39  0  0  0  0  0  0  0  0999 V2000
   -0.0756    1.4871    0.0126 C   0  0  0  0  0  0  0  0  0  0  0  0
   -0.1711    0.1087   -0.0279 C   0  0  0  0  0  0  0  0  0  0  0  0
    1.7024    2.4181   -1.4438 C   0  0  0  0  0  0  0  0  0  0  0  0
    1.2780    2.1493    0.0014 C   0  0  0  0  0  0  0  0  0  0  0  0
    4.0566    2.1258   -1.5562 C   0  0  0  0  0  0  0  0  0  0  0  0
    3.0200    3.2408   -1.4745 C   0  0  0  0  0  0  0  0  0  0  0  0
    5.3771    2.4649   -2.1679 C   0  0  0  0  0  0  0  0  0  0  0  0
    5.3360    3.5561   -3.1945 C   0  0  0  0  0  0  0  0  0  0  0  0
    4.3624    4.6974   -3.0177 C   0  0  0  0  0  0  0  0  0  0  0  0
    2.9848    4.0991   -2.7358 C   0  0  0  0  0  0  0  0  0  0  0  0
    5.5331    0.7660   -0.1074 C   0  0  0  0  0  0  0  0  0  0  0  0
    5.9493    1.2250   -2.8005 C   0  0  0  0  0  0  0  0  0  0  0  0
    5.4083   -0.4628    0.3280 C   0  0  0  0  0  0  0  0  0  0  0  0
    6.6018   -1.3836    0.3340 C   0  0  0  0  0  0  0  0  0  0  0  0
    6.8237   -1.9272   -1.0539 C   0  0  0  0  0  0  0  0  0  0  0  0
    8.0425   -1.5175   -1.8395 C   0  0  0  0  0  0  0  0  0  0  0  0
    7.6330   -0.5409   -2.9449 C   0  0  0  0  0  0  0  0  0  0  0  0
    7.0530    0.7029   -2.3233 C   0  0  0  0  0  0  0  0  0  0  0  0
    6.3642   -2.4654    1.2369 O   0  0  0  0  0  0  0  0  0  0  0  0
    6.0497    2.7814   -1.3689 H   0  0  0  0  0  0  0  0  0  0  0  0
    3.1442    3.8416   -0.5783 H   0  0  0  0  0  0  0  0  0  0  0  0
   -1.2220    2.2583    0.0575 C   0  0  0  0  0  0  0  0  0  0  0  0
    3.3529    0.9655   -2.2082 C   0  0  0  0  0  0  0  0  0  0  0  0
    2.0209    1.1558   -2.1245 N   0  0  0  0  0  0  0  0  0  0  0  0
    3.8968    0.0126   -2.7251 O   0  0  0  0  0  0  0  0  0  0  0  0
    2.5573    3.2342   -3.9233 C   0  0  0  0  0  0  0  0  0  0  0  0
    7.8420   -0.6080    0.7824 C   0  0  0  0  0  0  0  0  0  0  0  0
    8.6854   -2.7564   -2.4662 C   0  0  0  0  0  0  0  0  0  0  0  0
   -2.4638    1.6511    0.0620 C   0  0  0  0  0  0  0  0  0  0  0  0
   -2.5593    0.2726    0.0211 C   0  0  0  0  0  0  0  0  0  0  0  0
   -1.4128   -0.4988   -0.0176 C   0  0  0  0  0  0  0  0  0  0  0  0
    6.0239   -2.6922   -1.5370 O   0  0  0  0  0  0  0  0  0  0  0  0
    4.7980    5.5725   -1.8406 C   0  0  0  0  0  0  0  0  0  0  0  0
    6.0724    3.5235   -4.1510 O   0  0  0  0  0  0  0  0  0  0  0  0
    4.3421    1.6906   -0.1181 C   0  0  0  0  0  0  0  0  0  0  0  0
    4.6235    2.8408    0.6818 O   0  0  0  0  0  0  0  0  0  0  0  0
  1  2  1  0      
  4  1  1  0      
  5  6  1  0      
  6  3  1  0      
  5  7  1  0      
  7  8  1  0      
  8  9  1  0      
  9 10  1  0      
 10  6  1  0      
 11 13  2  0      
 13 14  1  0      
 14 15  1  0      
 15 16  1  0      
 16 17  1  0      
 17 18  1  0      
 18 12  2  0      
 14 19  1  0      
  7 12  1  0      
  7 20  1  0      
  6 21  1  0      
  3  4  1  0      
  1 22  2  0      
  5 23  1  0      
 23 24  1  0      
 24  3  1  0      
 23 25  2  0      
 10 26  1  0      
 14 27  1  0      
 16 28  1  0      
 22 29  1  0      
 29 30  2  0      
 30 31  1  0      
 31  2  2  0      
 15 32  2  0      
  9 33  1  0      
  8 34  2  0      
 11 35  1  0      
  5 35  1  0      
 35 36  1  0      
M  END
$$$$
