# Supplementary material for: Bioactive Phenylalanine Derivatives and Cytochalasins from the Soft Coral-Derived Fungus, Aspergillus elegans
Source: MDPI journal article supplement (doi:10.3390/md11062054), 2013-06-10
Supplement: s17 [file s17]

marinedrugs-11-02054-s008.mol
  ChemDraw02071408412D

 36 39  0  0  0  0  0  0  0  0999 V2000
   -2.8153   -0.1378    0.0000 C   0  0  0  0  0  0  0  0  0  0  0  0
   -2.8153   -0.9628    0.0000 C   0  0  0  0  0  0  0  0  0  0  0  0
   -1.3863   -0.1378    0.0000 C   0  0  0  0  0  0  0  0  0  0  0  0
   -2.1008    0.2747    0.0000 C   0  0  0  0  0  0  0  0  0  0  0  0
    0.0426   -0.1378    0.0000 C   0  0  0  0  0  0  0  0  0  0  0  0
   -0.6719    0.2747    0.0000 C   0  0  0  0  0  0  0  0  0  0  0  0
    0.7571    0.2747    0.0000 C   0  0  0  0  0  0  0  0  0  0  0  0
    0.7571    1.0997    0.0000 C   0  0  0  0  0  0  0  0  0  0  0  0
    0.0426    1.5122    0.0000 C   0  0  0  0  0  0  0  0  0  0  0  0
   -0.6719    1.0997    0.0000 C   0  0  0  0  0  0  0  0  0  0  0  0
    1.4716   -0.9628    0.0000 C   0  0  0  0  0  0  0  0  0  0  0  0
    1.4716   -0.1378    0.0000 C   0  0  0  0  0  0  0  0  0  0  0  0
    2.0549   -1.5462    0.0000 C   0  0  0  0  0  0  0  0  0  0  0  0
    2.9317   -1.5403    0.0000 C   0  0  0  0  0  0  0  0  0  0  0  0
    3.4473   -1.0247    0.0000 C   0  0  0  0  0  0  0  0  0  0  0  0
    3.4473   -0.1378    0.0000 C   0  0  0  0  0  0  0  0  0  0  0  0
    2.8799    0.4456    0.0000 C   0  0  0  0  0  0  0  0  0  0  0  0
    2.0549    0.4456    0.0000 C   0  0  0  0  0  0  0  0  0  0  0  0
    2.7182   -2.3372    0.0000 O   0  0  0  0  0  0  0  0  0  0  0  0
    1.4716    0.6872    0.0000 H   0  0  0  0  0  0  0  0  0  0  0  0
   -1.3863    0.6872    0.0000 H   0  0  0  0  0  0  0  0  0  0  0  0
   -3.5297    0.2747    0.0000 C   0  0  0  0  0  0  0  0  0  0  0  0
   -0.5408   -0.7212    0.0000 C   0  0  0  0  0  0  0  0  0  0  0  0
   -1.0489   -0.8597    0.0000 N   0  0  0  0  0  0  0  0  0  0  0  0
   -0.1283   -1.4356    0.0000 O   0  0  0  0  0  0  0  0  0  0  0  0
   -1.3863    1.5122    0.0000 C   0  0  0  0  0  0  0  0  0  0  0  0
    3.5151   -2.1237    0.0000 C   0  0  0  0  0  0  0  0  0  0  0  0
    4.2442    0.0757    0.0000 C   0  0  0  0  0  0  0  0  0  0  0  0
   -4.2442   -0.1378    0.0000 C   0  0  0  0  0  0  0  0  0  0  0  0
   -4.2442   -0.9628    0.0000 C   0  0  0  0  0  0  0  0  0  0  0  0
   -3.5297   -1.3753    0.0000 C   0  0  0  0  0  0  0  0  0  0  0  0
    4.2442   -1.2382    0.0000 O   0  0  0  0  0  0  0  0  0  0  0  0
    0.0426    2.3372    0.0000 C   0  0  0  0  0  0  0  0  0  0  0  0
    1.4716    1.5122    0.0000 O   0  0  0  0  0  0  0  0  0  0  0  0
    0.6466   -0.9628    0.0000 C   0  0  0  0  0  0  0  0  0  0  0  0
    0.6466   -1.7878    0.0000 O   0  0  0  0  0  0  0  0  0  0  0  0
  1  2  1  0      
  4  1  1  0      
  5  6  1  0      
  6  3  1  0      
  5  7  1  0      
  7  8  1  0      
  8  9  1  0      
  9 10  1  0      
 10  6  1  0      
 11 13  2  0      
 13 14  1  0      
 14 15  1  0      
 15 16  1  0      
 16 17  1  0      
 17 18  1  0      
 18 12  2  0      
 14 19  1  6      
  7 12  1  6      
  7 20  1  1      
  6 21  1  1      
  3  4  1  1      
  1 22  2  0      
  5 23  1  6      
 23 24  1  0      
 24  3  1  0      
 23 25  2  0      
 10 26  1  6      
 14 27  1  1      
 16 28  1  6      
 22 29  1  0      
 29 30  2  0      
 30 31  1  0      
 31  2  2  0      
 15 32  2  0      
  9 33  1  1      
  8 34  2  0      
 11 35  1  0      
  5 35  1  0      
 35 36  1  1      
M  END
