# Supplementary material for: Bioactive Phenylalanine Derivatives and Cytochalasins from the Soft Coral-Derived Fungus, Aspergillus elegans
Source: MDPI journal article supplement (doi:10.3390/md11062054), 2013-06-10
Supplement: s18 [file s18]

marinedrugs-11-02054-s009.mol
  ChemDraw02071408412D

 36 40  0  0  0  0  0  0  0  0999 V2000
   -2.8153   -0.1790    0.0000 C   0  0  0  0  0  0  0  0  0  0  0  0
   -2.8153   -1.0040    0.0000 C   0  0  0  0  0  0  0  0  0  0  0  0
   -1.3863   -0.1790    0.0000 C   0  0  0  0  0  0  0  0  0  0  0  0
   -2.1008    0.2335    0.0000 C   0  0  0  0  0  0  0  0  0  0  0  0
    0.0426   -1.0040    0.0000 O   0  0  0  0  0  0  0  0  0  0  0  0
    0.0426   -0.1790    0.0000 C   0  0  0  0  0  0  0  0  0  0  0  0
   -0.6719    0.2335    0.0000 C   0  0  0  0  0  0  0  0  0  0  0  0
    0.7571    0.2335    0.0000 C   0  0  0  0  0  0  0  0  0  0  0  0
    0.7571    1.0585    0.0000 C   0  0  0  0  0  0  0  0  0  0  0  0
    0.0426    1.4710    0.0000 C   0  0  0  0  0  0  0  0  0  0  0  0
   -0.6719    1.0585    0.0000 C   0  0  0  0  0  0  0  0  0  0  0  0
    0.7571   -1.4165    0.0000 C   0  0  0  0  0  0  0  0  0  0  0  0
    1.4716   -1.0040    0.0000 C   0  0  0  0  0  0  0  0  0  0  0  0
    1.4716   -0.1790    0.0000 C   0  0  0  0  0  0  0  0  0  0  0  0
    2.0549   -1.5874    0.0000 C   0  0  0  0  0  0  0  0  0  0  0  0
    2.9317   -1.5815    0.0000 C   0  0  0  0  0  0  0  0  0  0  0  0
    3.4473   -1.0659    0.0000 C   0  0  0  0  0  0  0  0  0  0  0  0
    3.4473   -0.1790    0.0000 C   0  0  0  0  0  0  0  0  0  0  0  0
    2.8799    0.4043    0.0000 C   0  0  0  0  0  0  0  0  0  0  0  0
    2.0549    0.4043    0.0000 C   0  0  0  0  0  0  0  0  0  0  0  0
    0.7571   -2.2415    0.0000 O   0  0  0  0  0  0  0  0  0  0  0  0
    1.4716    0.6460    0.0000 H   0  0  0  0  0  0  0  0  0  0  0  0
   -1.3863    0.6460    0.0000 H   0  0  0  0  0  0  0  0  0  0  0  0
   -3.5297    0.2335    0.0000 C   0  0  0  0  0  0  0  0  0  0  0  0
   -0.5408   -0.7624    0.0000 C   0  0  0  0  0  0  0  0  0  0  0  0
   -1.0489   -0.9009    0.0000 N   0  0  0  0  0  0  0  0  0  0  0  0
   -0.3272   -1.5593    0.0000 O   0  0  0  0  0  0  0  0  0  0  0  0
   -1.3863    1.4710    0.0000 C   0  0  0  0  0  0  0  0  0  0  0  0
    4.2442    0.0345    0.0000 C   0  0  0  0  0  0  0  0  0  0  0  0
    0.0426    2.2960    0.0000 C   0  0  0  0  0  0  0  0  0  0  0  0
    0.8279    1.8629    0.0000 O   0  0  0  0  0  0  0  0  0  0  0  0
   -4.2442   -0.1790    0.0000 C   0  0  0  0  0  0  0  0  0  0  0  0
   -4.2442   -1.0040    0.0000 C   0  0  0  0  0  0  0  0  0  0  0  0
   -3.5297   -1.4165    0.0000 C   0  0  0  0  0  0  0  0  0  0  0  0
    4.1618   -1.4784    0.0000 O   0  0  0  0  0  0  0  0  0  0  0  0
    3.3442   -2.2960    0.0000 C   0  0  0  0  0  0  0  0  0  0  0  0
  1  2  1  0      
  4  1  1  0      
  5  6  1  0      
  6  7  1  0      
  7  3  1  0      
  6  8  1  0      
  8  9  1  0      
  9 10  1  0      
 10 11  1  0      
 11  7  1  0      
  5 12  1  0      
 12 13  1  0      
 13 15  1  0      
 15 16  2  0      
 16 17  1  0      
 17 18  1  0      
 18 19  1  0      
 19 20  1  0      
 20 14  2  0      
 12 21  2  0      
  8 14  1  6      
  8 22  1  1      
  7 23  1  1      
  3  4  1  1      
  1 24  2  0      
  6 25  1  6      
 25 26  1  0      
 26  3  1  0      
 25 27  2  0      
 11 28  1  6      
 18 29  1  6      
 10 30  1  6      
 10 31  1  1      
 31  9  1  1      
 24 32  1  0      
 32 33  2  0      
 33 34  1  0      
 34  2  2  0      
 17 35  2  0      
 16 36  1  0      
M  END
